# Supplementary material for: A systematic literature review of the efficacy, effectiveness, and safety of filgrastim
Source: Springer Nature journal article supplement (doi:10.1007/s00520-017-3854-x), 2017-09-22
Supplement: MOESM1 [file 15081008]

## ONLINE SUPPLEMENTARY MATERIALS ONLY

### A systematic literature review of the efficacy, effectiveness, and safety of filgrastim

**Journal:** *Supportive Care in Cancer*

**Authors:** David C. Dale,<sup>1</sup> Jeffrey Crawford,<sup>2</sup> Zandra Klippel,<sup>3</sup> Maureen Reiner,<sup>4</sup> Timothy Osslund,<sup>5</sup> Ellen Fan,<sup>6</sup> Phuong Khanh Morrow,<sup>3</sup> Kim Allcott,<sup>7</sup> Gary H. Lyman<sup>1,8</sup>

**Affiliations:** <sup>1</sup>Department of Medicine, University of Washington, Seattle, WA 98195, USA; <sup>2</sup>Duke Cancer Institute, Duke University Medical Center, Durham, NC 27710, USA; <sup>3</sup>Clinical Development, Amgen Inc., 1 Amgen Center Drive, Thousand Oaks, CA 91320, USA; <sup>4</sup>Global Biostatistical Sciences, Amgen Inc., 1 Amgen Center Drive, Thousand Oaks, CA 91320, USA; <sup>5</sup>Pre-Pivotal Drug Product Technologies, Amgen Inc., 1 Amgen Center Drive, Thousand Oaks, CA 91320, USA; <sup>6</sup>Global Scientific Affairs, Amgen Inc., 1 Amgen Center Drive, Thousand Oaks, CA 91320, USA; <sup>7</sup>Oxford PharmaGenesis Ltd, Tubney Warren Barn, Tubney, Oxford OX13 5QJ, UK; <sup>8</sup>Public Health Sciences Division and Clinical Research Division, Fred Hutchinson Cancer Research Center, Seattle, WA 98109, USA

#### **Corresponding author:**

David C. Dale, MD

Department of Medicine, University of Washington

1959 NE Pacific St

Seattle, WA 98195, USA

Phone: +1 206-543-7215; Fax: 206-685-4458

Email: dcdale@uw.edu

**Online Resource 1.** Details of search strategy and results

| <b>Number</b>          | <b>MEDLINE &amp; MEDLINE InProcess Searches</b> | <b>Results</b> |
|------------------------|-------------------------------------------------|----------------|
| 1                      | rhg-csf.mp.                                     | 1139           |
| 2                      | rhgcsf.mp.                                      | 19             |
| 3                      | rhg?csf.mp.                                     | 31             |
| 4                      | r-met-HuG-CSF.mp.                               | 5              |
| 5                      | r-metHuG-CSF.mp.                                | 85             |
| 6                      | rmet?HuG-CSF.mp.                                | 8              |
| 7                      | recombinant human.mp.                           | 35091          |
| 8                      | recombinant methionyl human.mp.                 | 123            |
| 9                      | g-csf.mp.                                       | 12140          |
| 10                     | gcsf.mp.                                        | 418            |
| 11                     | granulocyte colony-stimulating factor.mp.       | 17537          |
| 12                     | 1 or 2 or 3 or 4 or 5 or 6                      | 1258           |
| 13                     | 7 or 8                                          | 35192          |
| 14                     | 9 or 10 or 11                                   | 20201          |
| 15                     | 13 and 14                                       | 2059           |
| 16                     | filgrastim.mp.                                  | 2061           |
| 17                     | NEUPOGEN.mp.                                    | 144            |
| 18                     | 12 or 15 or 16 or 17                            | 4254           |
| 19                     | limit 18 to (English language and humans)       | 3406           |
| <b>EMBASE Searches</b> |                                                 |                |
| 1                      | rhg-csf.mp.                                     | 1342           |
| 2                      | rhgcsf.mp.                                      | 37             |
| 3                      | rhg?csf.mp.                                     | 46             |
| 4                      | r-met-HuG-CSF.mp.                               | 5              |

|    |                                           |       |
|----|-------------------------------------------|-------|
| 5  | r-metHuG-CSF.mp.                          | 100   |
| 6  | rmet?HuG-CSF.mp.                          | 10    |
| 7  | recombinant human.mp.                     | 43024 |
| 8  | recombinant methionyl human.mp.           | 141   |
| 9  | g-csf.mp.                                 | 18150 |
| 10 | gcsf.mp.                                  | 1491  |
| 11 | granulocyte colony-stimulating factor.mp. | 46811 |
| 12 | 1 or 2 or 3 or 4 or 5 or 6                | 1487  |
| 13 | 7 or 8                                    | 43139 |
| 14 | 9 or 10 or 11                             | 48580 |
| 15 | 13 and 14                                 | 2677  |
| 16 | filgrastim.mp.                            | 3643  |
| 17 | NEUPOGEN.mp.                              | 2276  |
| 18 | 12 or 15 or 16 or 17                      | 7997  |
| 19 | limit 18 to (human and English language)  | 5858  |
| 20 | limit 18 to conference abstract           | 833   |
| 21 | 19 not 20                                 | 5248  |

---

**Cochrane Library Searches**

---

|   |                               |      |
|---|-------------------------------|------|
| 1 | rhg-csf                       | 172  |
| 2 | rhgcsf                        | 0    |
| 3 | rhg*csf                       | 2    |
| 4 | r-met-HuG-CSF                 | 2    |
| 5 | r-metHuG-CSF                  | 62   |
| 6 | rmet*HuG-CSF                  | 1    |
| 7 | "recombinant human"           | 3718 |
| 8 | "recombinant methionyl human" | 41   |

|    |                                         |      |
|----|-----------------------------------------|------|
| 9  | g-csf                                   | 1718 |
| 10 | gcsf                                    | 77   |
| 11 | "granulocyte colony-stimulating factor" | 2138 |
| 12 | #1 or #2 or #3 or #4 or #5 or #6        | 235  |
| 13 | #7 or #8                                | 3758 |
| 14 | #9 or #10 or #11                        | 2776 |
| 15 | #13 and #14                             | 318  |
| 16 | filgrastim                              | 660  |
| 17 | NEUPOGEN                                | 51   |
| 18 | #12 or #15 or #16 or #17                | 992  |

---

**Congress Searches<sup>a</sup>**

---

|   |               |
|---|---------------|
| 1 | Filgrastim    |
| 2 | NEUPOGEN      |
| 3 | rhG-CSF       |
| 4 | r-met-HuG-CSG |

<sup>a</sup>The 16 congresses searched include: Academy of Managed Care Pharmacy, American College of Clinical Pharmacy, American Society for Blood and Marrow Transplantation, American Society of Clinical Oncology, American Society of Hematology, American Society of Hospital Pharmacists, European Hematology Association, European Society for Blood and Marrow Transplantation, European Society for Medical Oncology; ISPOR (International Society for Pharmacoeconomics and Outcomes Research); including European, North American, and Latin American conferences, Multinational Association of Supportive Care in Cancer, and San Antonio Breast Cancer Symposium.

**Online Resource 2:** Studies included in the meta-analysis of data in CIN

Studies that had reported sufficient homogeneous data for incidence of FN, grade 3 and 4 neutropenia, or bone pain were identified, and meta-analysis was performed for these outcomes. Meta-analysis for incidence of FN included data from 9 of the 11 identified randomized controlled trials (RCTs) [4, 19-21, 23, 24, 26, 27, 29], meta-analysis for incidence of grade 3 or 4 neutropenia included data from 5 RCTs [4, 19, 20, 25, 27] and 1 nonrandomized clinical trial (NCT) [30], and meta-analysis for incidence of bone pain included data from 5 RCTs [4, 23, 25, 27, 28]. Data for patients enrolled in the RCT by Osby et al 2003 [27] were analyzed separately for the subgroup of patients with non-Hodgkin's lymphoma (NHL) who received cyclophosphamide, doxorubicin, vincristine, prednisone (CHOP) (filgrastim, n=101; no filgrastim, n=104) and those who received cyclophosphamide, mitoxantrone, vincristine, prednisone (CNOP) (filgrastim, n=103; no filgrastim, n=100) for incidence of FN, grade 3 or 4 neutropenia, and bone pain. Also data for patients enrolled in the NCT by Blayney et al 2005 [30] were analyzed separately for the subgroup of 33 patients with non-small cell lung cancer (NSCLC) (filgrastim, n=24; no filgrastim, n=9) and the subgroup of 15 patients with NHL (filgrastim, n=10; no filgrastim, n=5) who had received the 21-day standard chemotherapy regimens.

**Online Resource 3: Details of search results**

Part 1 of the search identified 9953 records. Of these 9646 were retrieved from the electronic databases. An additional 12 records were identified from reviewing bibliographies of 3 recent systematic review articles identified as part of the search—Cooper et al 2011 [13], Renner et al 2012 [14], and Sheppard et al 2012 [15]. Removal of 3364 duplicates and 1 record (Erduran et al 1994) that was not available for further assessment resulted in 6588 records. From these, 4934 records were excluded on the basis of title/abstract screening, leaving 1654 records. Full-text review of the 1654 records eliminated another 460, leaving 1194 publications in total that met the eligibility criteria for part 1 of the search.

In part 2 of this analysis, the 1194 publications selected in part 1 were screened to identify studies comparing originator filgrastim (NEUPOGEN<sup>®</sup>) to placebo or no treatment. Of these, 828 were excluded on the basis of title/abstract screening (Figure 1). Full-text review of the remaining 366 publications led to exclusion of 336 publications. An additional four publications were excluded on further review: two reported filgrastim use outside its US-approved indications (one in established FN [52] and the other for priming with filgrastim [53]), one reported results from a subset population of a phase 3 clinical trial in severe chronic neutropenia (SCN) [54], and another compared filgrastim to other hematopoietic growth factors with no placebo or no treatment comparator arm [55]. The remaining 26 publications consisted of 25 full articles and one abstract (He et al 2012) [19]. The 26 publications were from 25 separate studies; two publications, Heil et al 1997 [33] and Heil et al 2006 [39], were from 1 RCT that evaluated filgrastim as an adjunct to chemotherapy for adults with de novo acute myeloid leukemia. Heil et al 1997 [33] reported the primary safety and efficacy results, and Heil et al 2006 [39] reported long-term survival data from the trial.

**Online Resource 4:** Key characteristics of studies that compared filgrastim with placebo or no treatment by indication and study type

| Author, Year                            | Country                  | Disease Type     | Chemotherapy                                               | Filgrastim Intervention: Patient Numbers, Dose, Route, Timing, and Treatment Duration                                                                                                                     | Age (years) Mean $\pm$ SD or Median (range)                             | Reported Outcomes                                                                                                                                                                                             | Follow-Up Time                                      |
|-----------------------------------------|--------------------------|------------------|------------------------------------------------------------|-----------------------------------------------------------------------------------------------------------------------------------------------------------------------------------------------------------|-------------------------------------------------------------------------|---------------------------------------------------------------------------------------------------------------------------------------------------------------------------------------------------------------|-----------------------------------------------------|
| <b>Chemotherapy-induced neutropenia</b> |                          |                  |                                                            |                                                                                                                                                                                                           |                                                                         |                                                                                                                                                                                                               |                                                     |
| <b>Randomized controlled trials</b>     |                          |                  |                                                            |                                                                                                                                                                                                           |                                                                         |                                                                                                                                                                                                               |                                                     |
| Crawford et al, 1991 [4]                | US                       | SCLC             | CAE                                                        | N = 199<br>Filgrastim: n = 95<br>Placebo: n = 104<br><br>230 $\mu\text{g}/\text{m}^2/\text{day}$ , SC; from day 4 to 17 after start of chemotherapy (21 days cycle); administered for a median of 13 days | Median (range)<br>Filgrastim: 62 (31–78)<br>Placebo: 63 (31–80)         | Incidence of fever with neutropenia and $\text{ANC} < 0.5 \times 10^9/\text{L}$ , mean absolute neutrophil nadir, duration of neutropenia, antibiotic use per cycle, duration of hospital stay per cycle, AEs | NR                                                  |
| Trillet-Lenoir et al, 1993 [23]         | Europe (13 centers)      | SCLC             | CDE                                                        | N = 129<br>Filgrastim: n = 65<br>Placebo: n = 64<br><br>230 $\mu\text{g}/\text{m}^2$ , SC, on day 4 for a maximum of 14 days during each cycle                                                            | Median (range)<br>Filgrastim: 58 (NR)<br>Placebo: 60 (NR)               | Incidence of FN (primary outcome), duration and severity of neutropenia, antibiotic use, duration of hospitalization, tumor response rates, survival                                                          | NR                                                  |
| Zinzani et al, 1997 [25]                | Italy                    | High-grade NHL   | VNCOP                                                      | N = 149<br>Filgrastim: n = 77<br>No filgrastim: n = 72<br><br>5 mg/kg/day, SC; starting on day 3 of every week for 5 consecutive days                                                                     | Median (range)<br>Filgrastim: 69 (60–82)<br>No filgrastim: 70 (60–80)   | CR rate, RFS, PFS, OS, chemotherapy dose delay, RDI, incidence of infections, neutropenia                                                                                                                     | 30 months                                           |
| Pui et al, 1997 [29]                    | US                       | ALL              | Remission-induction therapy (not specified)                | N = 148<br>Filgrastim: n = 73<br>Placebo: n = 75<br><br>10 mg/kg/day, SC; administered for 15 days                                                                                                        | Median (range)<br>Filgrastim: 5.8 (0.2–17.9)<br>Placebo: 5.7 (1.0–16.9) | FN, EFS, rate of hospitalization, severe infections, hospital stays                                                                                                                                           | Event free survival at 3 years: 83% in both groups. |
| Larson et al, 1998 [28]                 | US                       | ALL              | Intensive remission induction chemotherapy (not specified) | N = 198<br>Filgrastim: n = 102<br>Placebo: n = 96<br><br>5 $\mu\text{g}/\text{kg}/\text{day}$ , SC<br>Course 1: starting ~12 to 24 h after 3rd dose of daunorubicin<br>Course 2: starting on day 2        | Median age (range)<br>35 (16–79)                                        | ANC and platelet recovery, duration of neutropenia and thrombocytopenia, duration of hospitalization and fever $> 38.5^\circ\text{C}$ , DFS, OS, toxicity                                                     | Median (range), years<br>4.7 (2.0–6.4)              |
| Fossa et al, 1998 [24]                  | Norway, UK, Hungary, The | Germ cell tumors | BEP, EP, BOP, VIP-B                                        | N = 259                                                                                                                                                                                                   | Median (range)                                                          | Neutropenic fever, grade 4 FN, DFS, OS, RDI                                                                                                                                                                   | Not specified                                       |

| Author, Year                | Country                                                                                     | Disease Type  | Chemotherapy           | Filgrastim Intervention: Patient Numbers, Dose, Route, Timing, and Treatment Duration                                                                                                                            | Age (years) Mean $\pm$ SD or Median (range)                                              | Reported Outcomes                                                                                                                                                | Follow-Up Time                      |
|-----------------------------|---------------------------------------------------------------------------------------------|---------------|------------------------|------------------------------------------------------------------------------------------------------------------------------------------------------------------------------------------------------------------|------------------------------------------------------------------------------------------|------------------------------------------------------------------------------------------------------------------------------------------------------------------|-------------------------------------|
|                             | Netherlands, Belgium                                                                        |               |                        | Filgrastim: n = 129<br>No filgrastim: n = 130<br><br>5 $\mu$ g/kg, SC, QD; administered for a median of 14 days (BEP/EP) or 7 days (VIP)                                                                         | 28 (15-65)                                                                               |                                                                                                                                                                  |                                     |
| Doorduijn et al, 2003 [26]  | The Netherlands, Belgium                                                                    | NHL           | CHOP                   | N = 389<br>Filgrastim: n = 197<br>No filgrastim: n = 192<br><br>300 $\mu$ g, SC; on days 2 to 11; administer for a median of 9 days                                                                              | Mean $\pm$ SD<br>73 $\pm$ 5                                                              | RDI, CR rate, OS, EFS, PFS, DFS                                                                                                                                  | Median: 33 months<br>Total: 3 years |
| Osby et al, 2003 [27]       | Sweden, Norway, Denmark, Finland                                                            | NHL           | CHOP, CNOP             | N = 455<br>Filgrastim = 226<br>No filgrastim = 229<br><br>5 $\mu$ g/kg, SC; starting on day 2 for a maximum of 14 days, discontinued if ANC $>10 \times 10^9/L$ on day 11 or later                               | Median (range)<br>71 (60–86)                                                             | TTF (primary outcome), CR rate, OS, DFS, RDI, incidence of granulocytopenia, infections requiring hospitalizations                                               | Median (range), months: 57 (18–91)  |
| Papaldo et al, 2003 [20]    | Italy                                                                                       | Breast cancer | EC                     | N = 503<br>Filgrastim: n = 254<br>No filgrastim: n = 249<br><br>300 or 400 g/day, SC                                                                                                                             | Median (range)<br>45 (25–65)                                                             | DFS, OS, dose adjustments, dose intensity, toxicity and deaths or discontinuations due to toxicity                                                               | Median: 55 months                   |
| Del Giglio et al, 2008 [21] | Brazil, Romania, Germany, Belarus, Slovenia, South Africa, Chile, Russia, Lithuania, Poland | Breast cancer | Docetaxel, doxorubicin | N = 348<br>Filgrastim: n = 136<br>XM02: n = 140<br>Placebo/XM02: n = 72<br><br>Filgrastim or XM02: 5 $\mu$ g/kg/day, SC; starting on day 1 after chemotherapy; administered for a median of 9 days               | Median (range)<br>Filgrastim: 51 (28–74)<br>XM02: 51 (25–75)<br>Placebo/XM02: 48 (28–74) | DSN in cycle 1 (defined as # of days with grade 4 neutropenia with an ANC $<0.5 \times 10^9/L$ ), incidence of FN, depth of ANC nadir, time to ANC recovery, AEs | NR                                  |
| He et al, 2012 [19]         | China                                                                                       | Breast cancer | TEC                    | N = 107<br>PP filgrastim: n = 53<br>No PP filgrastim: n = 54<br><br>PP: 3 $\mu$ g/kg/day on day 3 to 8 (n = 53); administered for a median of 5 days<br>No PP: 5 $\mu$ g/kg/day on day of grade 3/4 neutropenia, | NR                                                                                       | Neutropenic fever, neutropenia, side-effects, costs, scores on the EORTC QLQ-C30 questionnaires                                                                  | NR                                  |



| Author, Year                        | Country | Disease Type                                                       | Chemotherapy                                              | Filgrastim Intervention: Patient Numbers, Dose, Route, Timing, and Treatment Duration                                                                                                                                                                                           | Age (years) Mean $\pm$ SD or Median (range)                                          | Reported Outcomes                                                                                                                                     | Follow-Up Time |
|-------------------------------------|---------|--------------------------------------------------------------------|-----------------------------------------------------------|---------------------------------------------------------------------------------------------------------------------------------------------------------------------------------------------------------------------------------------------------------------------------------|--------------------------------------------------------------------------------------|-------------------------------------------------------------------------------------------------------------------------------------------------------|----------------|
|                                     |         |                                                                    |                                                           | FN, and delayed recovery of ANC on day 21 until neutrophil recovery (N = 54)                                                                                                                                                                                                    |                                                                                      |                                                                                                                                                       |                |
| <b>Nonrandomized clinical trial</b> |         |                                                                    |                                                           |                                                                                                                                                                                                                                                                                 |                                                                                      |                                                                                                                                                       |                |
| Blayney et al, 2005 [30]            | US      | NSCLC and NHL                                                      | NSCLC: etoposide, cisplatin<br>NHL: CHOP                  | N = 104<br>NSCLC (n = 55):<br>Filgrastim = 46<br>No filgrastim = 9<br>NHL (n = 49):<br>Filgrastim = 44<br>No filgrastim = 5<br><br>NSCLC trial: 5 $\mu$ g/kg/day starting on day 4<br>NHL trial: 5 $\mu$ g/kg/day starting on day 2; administered for a median of 10 to 12 days | Median (range)<br>NSCLC (n = 55): 59 (39-79)<br>NHL (n = 49): 53 (28-73)             | Blood counts and blood chemistry, physical examinations, concomitant medications, AEs                                                                 | NR             |
| <b>Observational studies</b>        |         |                                                                    |                                                           |                                                                                                                                                                                                                                                                                 |                                                                                      |                                                                                                                                                       |                |
| Gilad et al, 1999 [31]              | Israel  | Breast cancer, lung cancer, NHL, Hodgkin's disease, and others     | Various                                                   | N = 209 (1079 cycles)<br>Cycles with PP filgrastim = 66<br>Cycles with no PP = 1013<br><br>3–5 $\mu$ m/kg of body weight; within 48 hours of chemotherapy                                                                                                                       | Median (range)<br>55 (19–88)                                                         | Incidence of FN, infection, infection-related hospitalization, mortality                                                                              | NR             |
| Hershman et al, 2009 [32]           | US      | Breast cancer, lung cancer, ovarian cancer, colon cancer, lymphoma | Various                                                   | N = 3123<br>PP G-CSF (filgrastim or pegfilgrastim) = 822<br>No PP G-CSF (delayed filgrastim or pegfilgrastim = 1523 or no G-CSF = 778)                                                                                                                                          | <65 years: 61% in PP vs 58% in no G-CSF<br>>65 years: 38% in PP vs 41.2% in no G-CSF | Risk of FN, patient characteristics associated with increased risk of FN                                                                              | NR             |
| Altwaigi et al, 2013 [18]           | Canada  | Breast cancer                                                      | Adjuvant treatment (taxane regimens $\pm$ anthracyclines) | N = 239<br>PP G-CSF (filgrastim or pegfilgrastim) = 145<br>No PP G-CSF (secondary G-CSF or no G-CSF) = 94<br>Filgrastim QD for 7 days; pegfilgrastim, single dose, 24 h after chemotherapy;                                                                                     | Median (range)<br>55 (32–80)                                                         | Use of filgrastim or pegfilgrastim as primary prophylaxis, subsequent dose reductions, chemotherapy delays, treatment discontinuation, RDI, FN events | NR             |

| Author, Year                        | Country                                                                                  | Disease Type | Chemotherapy                                                                                   | Filgrastim Intervention: Patient Numbers, Dose, Route, Timing, and Treatment Duration                                                                                                                                                                                 | Age (years) Mean $\pm$ SD or Median (range)                               | Reported Outcomes                                                                                                                                                                                                                                                              | Follow-Up Time                      |
|-------------------------------------|------------------------------------------------------------------------------------------|--------------|------------------------------------------------------------------------------------------------|-----------------------------------------------------------------------------------------------------------------------------------------------------------------------------------------------------------------------------------------------------------------------|---------------------------------------------------------------------------|--------------------------------------------------------------------------------------------------------------------------------------------------------------------------------------------------------------------------------------------------------------------------------|-------------------------------------|
|                                     |                                                                                          |              |                                                                                                | administered for a median of 7 days                                                                                                                                                                                                                                   |                                                                           |                                                                                                                                                                                                                                                                                |                                     |
| <b>Acute myeloid leukemia</b>       |                                                                                          |              |                                                                                                |                                                                                                                                                                                                                                                                       |                                                                           |                                                                                                                                                                                                                                                                                |                                     |
| <b>Randomized controlled trials</b> |                                                                                          |              |                                                                                                |                                                                                                                                                                                                                                                                       |                                                                           |                                                                                                                                                                                                                                                                                |                                     |
| Heil et al, 1997 [33] <sup>a</sup>  | Germany<br>Spain<br>Belgium<br>Portugal<br>Sweden<br>Austria<br>UK<br>Italy<br>Australia | AML          | Induction and consolidation chemotherapy with daunorubicin, cytarabine, and etoposide          | N = 521<br>Filgrastim: n = 259<br>No filgrastim: n = 262<br><br>5 $\mu$ g/kg/day, SC; from 24 hours after last chemotherapy dose until ANC $\geq 1.0 \times 10^9/L$ for 3 consecutive days or $\geq 10 \times 10^9/L$ for 1 day; administered for a median of 13 days | Median (range)<br>Filgrastim: 54 (16–89)<br>Placebo: 54 (16–88)           | Incidence and duration of fever, duration of neutropenia, incidence of infections, requirement for parenteral anti-infectives, duration of hospitalization, AEs, CR rate, DFS, OS                                                                                              | Median (range), months<br>24 (5–40) |
| Godwin et al, 1998 [35]             | US                                                                                       | AML          | Induction with cytarabine, daunorubicin                                                        | N = 211<br>Filgrastim: n = 106<br>Placebo: n = 105<br><br>400 $\mu$ g/m <sup>2</sup> , IV; from day 11, QD until ANC 1000 $\mu$ L                                                                                                                                     | Median (range)<br>68 (56–88)                                              | Treatment failures, toxicity criteria, duration of neutropenia, duration of thrombocytopenia, number of febrile days, antibiotic days, numbers and types of infection, number of hospital days                                                                                 | $\leq 3$ years                      |
| Harousseau et al, 2000 [37]         | France                                                                                   | AML          | Consolidation with either high-dose cytarabine plus mitoxantrone or 2 amsacrine plus etoposide | N = 194<br>Filgrastim: n = 100<br>No filgrastim: n = 94<br><br>5 $\mu$ g/kg, SC; from 1 day after ICC, QD until granulocytes $> 1 \times 10^9/L$ or $> 0.5 \times 10^9/L$ on 3 consecutive days; administered for a median of 8.4 days                                | Median (range)<br>Filgrastim: 47.5 (16–60)<br>No filgrastim: 45 (15–60)   | Duration of neutropenia (primary endpoint), incidence of septicemia and toxic deaths, duration of antibacterial and antifungal therapy, duration of hospitalization, # of confirmed infections, # of days of fever, thrombocytopenia, number of RBCs and platelet transfusions | Median: 26 months                   |
| Usuki et al, 2002 [36]              | Japan                                                                                    | de novo AML  | Induction chemotherapy not specified                                                           | N = 245<br>Filgrastim: n = 120<br>No filgrastim: n = 125<br><br>200 $\mu$ g/m <sup>2</sup> ; from 48 h after completion of chemotherapy until ANC $> 1.5 \times 10^9/L$                                                                                               | Median (range)<br>Filgrastim: 48.5 (15–75)<br>No filgrastim: 49.7 (15–87) | OS, hematological recovery, fever and infection, CR rate                                                                                                                                                                                                                       | Median: 20 months                   |
| Heil et al, 2006 [39] <sup>a</sup>  | Germany, Spain, Austria,                                                                 | AML          | Standard induction and                                                                         | N = 521<br>Filgrastim: n = 259                                                                                                                                                                                                                                        | Median (range):<br>Filgrastim: 54 (16–89)                                 | OS, DFS, time to death                                                                                                                                                                                                                                                         | Median (range),                     |

| Author, Year                        | Country                                         | Disease Type               | Chemotherapy                                            | Filgrastim Intervention: Patient Numbers, Dose, Route, Timing, and Treatment Duration                                                                                                                                      | Age (years) Mean $\pm$ SD or Median (range)                          | Reported Outcomes                                                                                                                                                                                                                                                                                                                                                                                                                                                       | Follow-Up Time    |
|-------------------------------------|-------------------------------------------------|----------------------------|---------------------------------------------------------|----------------------------------------------------------------------------------------------------------------------------------------------------------------------------------------------------------------------------|----------------------------------------------------------------------|-------------------------------------------------------------------------------------------------------------------------------------------------------------------------------------------------------------------------------------------------------------------------------------------------------------------------------------------------------------------------------------------------------------------------------------------------------------------------|-------------------|
|                                     | UK, Belgium, Portugal, Sweden, Italy, Australia |                            | consolidation chemotherapy (not specified)              | Placebo: n = 262<br><br>5 $\mu$ g/kg/day, SC; from 24 hours after last chemotherapy dose until ANC $\geq 1.0 \times 10^9$ /L for 3 consecutive days or $\geq 10 \times 10^9$ /L for 1 day                                  | Placebo: 54 (16–88)                                                  |                                                                                                                                                                                                                                                                                                                                                                                                                                                                         | years 7 (0.5–8.3) |
| Beksac et al, 2011 [34]             | Turkey                                          | AML                        | De novo AML induction therapy cytarabine and idarubicin | N = 260<br>Filgrastim: n = 123<br>No filgrastim: n = 137<br><br>5 $\mu$ g/kg IV; from day 8 of chemotherapy until ANC $> 0.5 \times 10^9$ /L for 2 consecutive day                                                         | Median (SD)<br>Filgrastim: 38.9 (13.5)<br>No filgrastim: 38.3 (14.0) | Duration of fever, use of antibacterial, antifungal, and antiviral therapies, duration of hospitalization, WBC recovery, severity and duration of leukopenia, need for RBC or platelet transfusions, survival, mortality rates and AEs, response to chemotherapy                                                                                                                                                                                                        | 3 years           |
| <b>Nonrandomized clinical trial</b> |                                                 |                            |                                                         |                                                                                                                                                                                                                            |                                                                      |                                                                                                                                                                                                                                                                                                                                                                                                                                                                         |                   |
| Moore et al, 1997 [38]              | US                                              | AML                        | Consolidation with diaziquone, mitoxantrone             | N = 123<br>Filgrastim: n = 61<br>No filgrastim: n = 62<br><br>5 $\mu$ g/kg; from day 4 of the chemotherapy course and continued until granulocyte $\geq 500$ / $\mu$ L on 2 successive days                                | Median (range)<br>41 (16–59)                                         | Granulocyte recovery (defined as the number of days from the date granulocytes decreased below 500/mL to the date of recovery of granulocytes $\geq 500$ /mL for 2 successive days), platelet recovery (defined as recovery to a post-nadir platelet count of $\geq 20000$ / $\mu$ L on 2 consecutive days without transfusions and evidence that platelet counts were stable or rising), survival time, duration of CR, duration of hospitalization and antibiotic use | Median 63 months  |
| <b>Severe chronic neutropenia</b>   |                                                 |                            |                                                         |                                                                                                                                                                                                                            |                                                                      |                                                                                                                                                                                                                                                                                                                                                                                                                                                                         |                   |
| <b>Randomized controlled trial</b>  |                                                 |                            |                                                         |                                                                                                                                                                                                                            |                                                                      |                                                                                                                                                                                                                                                                                                                                                                                                                                                                         |                   |
| Dale et al, 1993 [6]                | US                                              | Severe chronic neutropenia | NA                                                      | N = 123<br>Filgrastim: n = 63<br>4-month observation + filgrastim: n = 60<br>Total who received filgrastim = 120<br><br>Idiopathic neutropenia: 3.45 $\mu$ g/kg/d BID, SC<br>Cyclic neutropenia: 5.75 $\mu$ g/kg/d BID, SC | Median (range)<br>12.1 (0.6–75.7)                                    | Complete blood counts, bone marrow aspirates, physical examinations, concomitant medications, incidence and duration of infections, antibiotic use and hospitalizations, AEs                                                                                                                                                                                                                                                                                            | $\leq 4$ months   |

| Author, Year                       | Country | Disease Type                                                                                 | Chemotherapy | Filgrastim Intervention: Patient Numbers, Dose, Route, Timing, and Treatment Duration                                                                                                                                                                      | Age (years) Mean $\pm$ SD or Median (range)                        | Reported Outcomes                                                                                              | Follow-Up Time   |
|------------------------------------|---------|----------------------------------------------------------------------------------------------|--------------|------------------------------------------------------------------------------------------------------------------------------------------------------------------------------------------------------------------------------------------------------------|--------------------------------------------------------------------|----------------------------------------------------------------------------------------------------------------|------------------|
|                                    |         |                                                                                              |              | Congenital neutropenia:<br>11.50 $\mu$ g/kg/d BID, SC.<br>Dose was adjusted to maintain a median monthly ANC of 1.5–10.0 $\times$ 10 <sup>9</sup> /L                                                                                                       |                                                                    |                                                                                                                |                  |
| <b>Observational study</b>         |         |                                                                                              |              |                                                                                                                                                                                                                                                            |                                                                    |                                                                                                                |                  |
| Yilmaz et al, 2007 [40]            | Turkey  | Idiopathic SN, n = 31<br>Congenital SN, n = 3<br>Familial SN, n = 3<br>Auto immune SN, n = 2 | NA           | N = 39<br>Filgrastim: n = 16<br>No filgrastim: n = 23<br><br>5 $\mu$ g/kg/day; depending on response, the dose was gradually decreased to twice a week, then once a week, and eventually stopped if the ANC continued to be >1 $\times$ 10 <sup>9</sup> /L | Median (range)<br>15 months (3 months to 17 years)                 | Neutropenia resolved, neutropenia persisted                                                                    | $\leq$ 57 months |
| <b>Bone marrow transplantation</b> |         |                                                                                              |              |                                                                                                                                                                                                                                                            |                                                                    |                                                                                                                |                  |
| <b>Randomized controlled trial</b> |         |                                                                                              |              |                                                                                                                                                                                                                                                            |                                                                    |                                                                                                                |                  |
| Gonzalez-Vicent et al, 2004 [41]   | Spain   | Acute leukemia, lymphoma, solid tumor                                                        | NA           | N = 117<br>Filgrastim: n = 51<br>No filgrastim: n = 66<br><br>10 $\mu$ g/kg/day, SC; starting on day +5 until ANC was >0.5 $\times$ 10 <sup>9</sup> /L                                                                                                     | Median (range)<br>Filgrastim: 8 (1–18)<br>No filgrastim: 8 (1–18)  | Neutrophil engraftment, engraftment kinetics, duration of hospitalization, supportive care and treatment costs | NR               |
| <b>Observational study</b>         |         |                                                                                              |              |                                                                                                                                                                                                                                                            |                                                                    |                                                                                                                |                  |
| Gertz et al, 2011 [42]             | US      | Multiple myeloma                                                                             | NA           | N = 664<br>Filgrastim: n = 498<br>No filgrastim: n = 166<br><br>5 $\mu$ g/kg/day post-transplant day + 6 and until neutrophil engraftment was established                                                                                                  | Median (range):<br>Filgrastim: 8 (1–18)<br>No filgrastim: 8 (1–18) | Neutrophil engraftment, duration of hospitalization, frequency of bacteremia, AEs                              | NR               |

Note: filgrastim = originator filgrastim (NEUPOGEN®).

<sup>a</sup>The two publications Heil et al 1997 [33] and Heil et al 2006 [39] are from the same study.

Chemotherapy regimens: BEP = cisplatin, etoposide, bleomycin; BOP = bleomycin, vincristine, cisplatin; CAE = cyclophosphamide, doxorubicin, etoposide; CDE = cyclophosphamide, doxorubicin, etoposide; CHOP = cyclophosphamide, doxorubicin, vincristine, prednisone; CNOP = cyclophosphamide, mitoxantrone, vincristine, prednisone; EC = epirubicin, cyclophosphamide; EP = BEP without bleomycin; VIP-B = cisplatin, ifosfamide, etoposide, bleomycin; TEC = docetaxel, epirubicin, cyclophosphamide; VNCOP = cyclophosphamide, mitoxantrone, vincristine, etoposide, bleomycin, prednisone

AE = adverse event; ALL = acute lymphoblastic leukemia; AML = acute myeloid leukemia; ANC = absolute neutrophil count; BID = twice a day; CR = complete response; DFS = disease-free survival; DSN = duration of severe neutropenia; EFS = event-free survival; EORTC = European Organization for Research and Treatment of Cancer; FN = febrile neutropenia; G-CSF = granulocyte colony-stimulating factor; ICC = intensive consolidation chemotherapy; IV = intravenous; NA = not applicable; NHL = non-Hodgkin's lymphoma; NR = not reported; NSCLC = non-small cell lung cancer; OS = overall survival; PFS = progression-free survival; PP = primary prophylaxis; QD = daily; QLQ = quality of life questionnaire;; SC = subcutaneous; SCLC = small cell lung cancer; SD = standard deviation; SN = severe neutropenia; RBC = red blood cell; RDI = relative dose intensity; RFS = relapse-free survival; TTF = time to treatment failure; WBC = white blood cell.

**Online Resource 5: Filgrastim dose, timing, and duration**

In chemotherapy-induced neutropenia (CIN), filgrastim dose was reported in the 11 RCTs [4, 19-21, 23-29], 1 NCT [30], and 1 observational study [31], but was not reported in 2 observational studies [18, 32] (Online Resource 4). Filgrastim dose was not consistent across the 13 studies, with studies reporting filgrastim doses of 300 µg [26], 230 µg/m<sup>2</sup>/day [4, 23], 3–5 µg/kg/day [19, 21, 24, 27, 28, 30], 3–5 µm/kg [31], 5–10 mg/kg/day [25, 29], and 300 or 400 g/day [20]. Similarly, timing of filgrastim administration with respect to chemotherapy administration, reported in 10 studies, was not consistent across the studies, with filgrastim administered within 12-24 hours after the third dose of chemotherapy [28], within 2 days of chemotherapy [31], and on day 1 [21], day 2 [26, 27], day 3 [19, 25], or day 4 after start of chemotherapy [4, 23], and on day 4 in NSCLC or day 2 in NHL [30] after start of chemotherapy. Duration of filgrastim administration, reported in 10 studies [4, 19, 21, 23-27, 29, 30], varied across the studies, from a maximum of 5 days to a median of 14 days.

In AML, filgrastim dosing was reported in the 5 RCTs [33-37] and 1 NCT [38] (Online Resource 4). Filgrastim dose was not consistent across the 6 studies, with studies reporting filgrastim doses of 200–400 µg/m<sup>2</sup>/day [35, 36] or 5 µg/kg/day [33, 34, 37, 38]. Similarly, timing of filgrastim administration with respect to chemotherapy administration was not consistent across the 6 studies, with filgrastim administered 24 hours after last chemotherapy dose [33], from day 1 after intensive consolidation chemotherapy [ICC] [37], from day 2 after completion of chemotherapy [36], and from day 4 [38], day 8 [34], and day 11 [31] of the chemotherapy course. Duration of filgrastim administration was reported in the 6 studies and was maintained for varying periods, targeting different pre-specified absolute neutrophil count (ANC) levels.

In SCN, filgrastim dose was reported as 3.5-11.5 µg/kg/day in the RCT [6] and 5 µg/kg/day in the observational study [40] and was adjusted as needed in both studies to maintain a pre-specified ANC level. In bone marrow transplantation (BMT), filgrastim dose was reported as 10 µg/kg/day in the RCT [41], started at post-transplant day +5, and dosed until

ANC was  $>0.5 \times 10^9/L$ ; whereas it was started at  $5 \mu\text{g}/\text{kg}/\text{day}$  in the observational study [42], started at post-transplant day +6, and dosed until neutrophil engraftment was established.

**Online Resource 6: Efficacy, effectiveness, and safety of filgrastim compared with placebo or no treatment in CIN**

| Author, Year                        | Disease Type | Filgrastim Intervention and Patient Numbers | Efficacy and Effectiveness       |                                                                                                                                                                                          |                                                                                                                                                                                                           |                                                                                                                                                                                                            |                                                                                                                           |                                                                                                                            | Safety                                                                                                 |                                                                                                                                                                                                                      |
|-------------------------------------|--------------|---------------------------------------------|----------------------------------|------------------------------------------------------------------------------------------------------------------------------------------------------------------------------------------|-----------------------------------------------------------------------------------------------------------------------------------------------------------------------------------------------------------|------------------------------------------------------------------------------------------------------------------------------------------------------------------------------------------------------------|---------------------------------------------------------------------------------------------------------------------------|----------------------------------------------------------------------------------------------------------------------------|--------------------------------------------------------------------------------------------------------|----------------------------------------------------------------------------------------------------------------------------------------------------------------------------------------------------------------------|
|                                     |              |                                             | Time to ANC or Platelet Recovery | Incidence/Duration of FN                                                                                                                                                                 | Incidence/Duration of Grade 3 or Grade 4 Neutropenia                                                                                                                                                      | Incidence of Infection/Antibiotic Use                                                                                                                                                                      | Incidence/Duration of Hospitalizations                                                                                    | RDI, Dose Delays, or Dose Reductions                                                                                       | Survival/Mortality                                                                                     | Incidence of G-CSF-Related AEs n (%) <sup>a</sup>                                                                                                                                                                    |
| <b>Randomized controlled trials</b> |              |                                             |                                  |                                                                                                                                                                                          |                                                                                                                                                                                                           |                                                                                                                                                                                                            |                                                                                                                           |                                                                                                                            |                                                                                                        |                                                                                                                                                                                                                      |
| <b>Solid tumors</b>                 |              |                                             |                                  |                                                                                                                                                                                          |                                                                                                                                                                                                           |                                                                                                                                                                                                            |                                                                                                                           |                                                                                                                            |                                                                                                        |                                                                                                                                                                                                                      |
| Crawford et al, 1991 [4]            | SCLC         | N = 199<br>Filgrastim = 95<br>Placebo = 104 | –                                | FN incidence in cycle 1<br>28% vs 57%<br><i>P</i> < 0.001<br><br>FN incidence across 6 cycles<br>40% vs 77%<br><i>P</i> < 0.001<br><br>Median duration (days) in cycle 1<br>4 vs 5<br>NS | Grade 4 neutropenia incidence in cycle 1<br>84% vs 98%<br><i>P</i> = 0.001<br><br>Median duration (days) in cycle 1<br>3 vs 6<br><i>P</i> < 0.001<br><br>Median duration (days) across 6 cycles<br>1 vs 6 | Infection rate across 6 cycles<br>6.5% vs 13.3%<br>G-CSF vs placebo:<br>51% reduction/cycle<br><br>Mean days of antibiotic use/cycle<br>1.2 vs 2.3<br>RR (placebo vs filgrastim)<br>1.9, 95% CI: 1.44-2.51 | Mean days of hospitalization/cycle)<br>2.3 vs 4.2<br><br>Relative risk (placebo vs filgrastim)<br>1.55, 95% CI: 1.26-1.91 | NR                                                                                                                         | Median OS (months)<br>11.4 vs 12.2                                                                     | Mild to moderate bone pain<br>20% vs 0%<br><br>Mild rashes or Itching<br>6% vs 6%<br><br>AE leading to withdrawal request (abdominal pain, diffuse aches and pains, preexisting eczema flare-up)<br>3 (3%) vs 0 (0%) |
| Trillet-Lenoir et al, 1993 [23]     | SCLC         | N = 129<br>Filgrastim = 65<br>Placebo = 64  | –                                | FN incidence 26% vs 53%<br><i>P</i> = 0.002                                                                                                                                              | Median duration (days) of neutropenia over 6 cycles:<br>6 vs 15                                                                                                                                           | Infection rate 20% vs 33%<br><i>P</i> = 0.101<br><br>Infection-related deaths<br>1 vs 3<br><br>IV antibiotics use 37% vs 58%<br><i>P</i> < 0.02                                                            | Infection-related hospitalization 39% vs 58%<br><i>P</i> < 0.04                                                           | Dose reduction ≥15% over all cycles<br>29% vs 61%<br><i>P</i> < 0.001<br><br>Dose delay ≥2 days in ≥1 cycles<br>29% vs 47% | Median survival (months)<br><br>Extensive disease<br>8.9 vs 9.5<br><br>Limited disease<br>13.9 vs 12.8 | Incidence 15% vs 9%<br>Musculoskeletal pain, alopecia, nausea, vomiting, stomatitis, diarrhea                                                                                                                        |



| Author, Year                | Disease Type     | Filgrastim Intervention and Patient Numbers                    | Efficacy and Effectiveness       |                                                   |                                                                                                      |                                          |                                        |                                                                                                                                               | Safety                                                                                               |                                                                                                                                                                                    |
|-----------------------------|------------------|----------------------------------------------------------------|----------------------------------|---------------------------------------------------|------------------------------------------------------------------------------------------------------|------------------------------------------|----------------------------------------|-----------------------------------------------------------------------------------------------------------------------------------------------|------------------------------------------------------------------------------------------------------|------------------------------------------------------------------------------------------------------------------------------------------------------------------------------------|
|                             |                  |                                                                | Time to ANC or Platelet Recovery | Incidence/Duration of FN                          | Incidence/Duration of Grade 3 or Grade 4 Neutropenia                                                 | Incidence of Infection/Antibiotic Use    | Incidence/Duration of Hospitalizations | RDI, Dose Delays, or Dose Reductions                                                                                                          | Survival/Mortality                                                                                   | Incidence of G-CSF-Related AEs n (%) <sup>a</sup>                                                                                                                                  |
| Papaldo et al, 2003 [20]    | Breast Cancer    | N = 503<br>Filgrastim = 254<br>No filgrastim = 249             | –                                | FN incidence 1.2% vs 6.6%<br><i>P</i> = 0.004     | Grade 3/4 Neutropenia 28.6% vs 81.6%<br><i>P</i> < 0.00001                                           | NR                                       | NR                                     | Dose reduction 1.4% vs 3.6%<br><i>P</i> = 0.002<br><br>Dose delay 3.6% vs 10%<br><i>P</i> < 0.0001<br><br>Dose intensity 98.1% vs 95.5%<br>NS | 5-year OS 80.6% vs 79.6%<br>NS<br><br>DFS 67.2% vs 72.9%<br>NS                                       | Bone pain (grade 1 to 3) 42.5%<br>Fever (grade 1/2) 16.3%                                                                                                                          |
| Del Giglio et al, 2008 [21] | Breast cancer    | N = 348<br>Filgrastim = 136<br>XM02 = 140<br>Placebo/XM02 = 72 | –                                | FN incidence 20.7% vs 22.1% vs 41.7%              | Mean duration (days) of severe neutropenia<br>Cycle 1 1.1 vs 1.1 vs 3.8<br>Cycle 4 0.7 vs 0.7 vs 0.6 | NR                                       | NR                                     | NR                                                                                                                                            | 3 deaths in cycle 1<br>1 sepsis and 1 cardiorespiratory arrest in placebo; 1 ischemic stroke in XM02 | Most commonly reported drug-related AEs<br>bone pain (10.3%)<br>asthenia (7.8%)<br>myalgia (6.3%)<br>diarrhea (5.2%)                                                               |
| He et al, 2012 [19]         | Breast cancer    | N = 107<br>PP filgrastim = 53<br>No PP filgrastim = 54         | –                                | FN incidence 6.94% vs 15.32%<br><i>P</i> = 0.0482 | Grade 3/4 neutropenia 12.2% vs 52.3%<br><i>P</i> < 0.001                                             | NR                                       | NR                                     | NR                                                                                                                                            | NR                                                                                                   | Grade 3/4 neutropenia 12.2 vs 52.3<br><i>P</i> < 0.001<br><br>Reduced in filgrastim vs no filgrastim:<br>anemia,<br>asthenia,<br>stomatitis,<br>anorexia,<br>myalgia,<br>dysgeusia |
| Fossa et al, 1998 [24]      | Germ cell tumors | N = 259<br>Filgrastim = 129<br>No filgrastim = 130             | –                                | FN incidence 20% vs 30%<br><i>P</i> < 0.052       | NR                                                                                                   | Blood culture proven sepsis 6.3% vs 7.8% | NR                                     | Received ≥6 chemotherapy cycles 86% vs 71%<br><i>P</i> = 0.003                                                                                | 1-year survival 83% (78–91) vs 75% (67–82)                                                           | n, (%)<br>BEP/EP and BOP/VIP-B<br>WBC                                                                                                                                              |

| Author, Year | Disease Type | Filgrastim Intervention and Patient Numbers | Efficacy and Effectiveness       |                          |                                                      |                                       |                                        |                                                                       | Safety                          |                                                                                                                                                                                                                                                                                                                                                                                                                                                                                     |
|--------------|--------------|---------------------------------------------|----------------------------------|--------------------------|------------------------------------------------------|---------------------------------------|----------------------------------------|-----------------------------------------------------------------------|---------------------------------|-------------------------------------------------------------------------------------------------------------------------------------------------------------------------------------------------------------------------------------------------------------------------------------------------------------------------------------------------------------------------------------------------------------------------------------------------------------------------------------|
|              |              |                                             | Time to ANC or Platelet Recovery | Incidence/Duration of FN | Incidence/Duration of Grade 3 or Grade 4 Neutropenia | Incidence of Infection/Antibiotic Use | Incidence/Duration of Hospitalizations | RDI, Dose Delays, or Dose Reductions                                  | Survival/Mortality              | Incidence of G-CSF-Related AEs n (%) <sup>a</sup>                                                                                                                                                                                                                                                                                                                                                                                                                                   |
|              |              |                                             |                                  |                          |                                                      |                                       |                                        | Dose intensity: Significantly higher dose intensities with filgrastim | Death due to toxicities 5 vs 15 | Grade 3: 7 (11)/12 (18) and 23 (36)/24 (37)<br>Grade 4: 8 (13)/12 (18) and 8 (13)/32 (49)<br>Platelet count<br>Grade 3: 14 (22)/15 (23) and 4 (6)/10 (15)<br>Grade 4: 13 (21)/25 (38) and 6 (9)/22 (33)<br>Neutropenic fever<br>9 (14)/16 (25) and 8 (13)/30 (46)<br>Blood culture proven sepsis<br>4 (6)/4 (6) and 3 (5)/7 (11)<br>Mucosal toxicity<br>Grade 3: 4 (6)/4 (6) and 2 (3)/3 (5)<br>Grade 4: 0 (0)/0 (0) and 0 (0)/3 (5)<br>Pulmonary toxicity<br>Grade 1/2: 16 (25)/11 |

| Author, Year               | Disease Type   | Filgrastim Intervention and Patient Numbers        | Efficacy and Effectiveness       |                                                                                                                        |                                                                       |                                                                                                                                                                                                                                                                                                                                        |                                                                           |                                                                               | Safety                                         |                                                                                                                                |
|----------------------------|----------------|----------------------------------------------------|----------------------------------|------------------------------------------------------------------------------------------------------------------------|-----------------------------------------------------------------------|----------------------------------------------------------------------------------------------------------------------------------------------------------------------------------------------------------------------------------------------------------------------------------------------------------------------------------------|---------------------------------------------------------------------------|-------------------------------------------------------------------------------|------------------------------------------------|--------------------------------------------------------------------------------------------------------------------------------|
|                            |                |                                                    | Time to ANC or Platelet Recovery | Incidence/Duration of FN                                                                                               | Incidence/Duration of Grade 3 or Grade 4 Neutropenia                  | Incidence of Infection/Antibiotic Use                                                                                                                                                                                                                                                                                                  | Incidence/Duration of Hospitalizations                                    | RDI, Dose Delays, or Dose Reductions                                          | Survival/Mortality                             | Incidence of G-CSF-Related AEs n (%) <sup>a</sup>                                                                              |
|                            |                |                                                    |                                  |                                                                                                                        |                                                                       |                                                                                                                                                                                                                                                                                                                                        |                                                                           |                                                                               |                                                | (17) and 10 (16)/9 (14)<br>Grade 3: 0 (0)/3 (5) and 2 (3)/1 (2)<br>Grade 4: 2 (3)/1 (2) and 0 (0)/3 (5)                        |
| NHL                        |                |                                                    |                                  |                                                                                                                        |                                                                       |                                                                                                                                                                                                                                                                                                                                        |                                                                           |                                                                               |                                                |                                                                                                                                |
| Zinzani et al, 1997 [25]   | High-grade NHL | N = 149<br>Filgrastim = 77<br>No filgrastim = 72   | –                                | NR                                                                                                                     | Grade 4 neutropenia incidence<br>23.0% vs 55.5%<br><i>P</i> = 0.00005 | Infections<br>4/77 pts (5%) vs 15/72 pts (21%)<br><i>P</i> = 0.004<br><br>Antibiotic use<br>For filgrastim, 4 pts with minor infections required symptomatic treatments and/or oral antibiotics vs<br>For control, 5 pts with major infections and 10 pts with minor infections required parenteral antibiotics and/or hospitalization | NR                                                                        | Average RDI<br>95% vs 85%<br>NS                                               | OS at 30 months<br>64% vs 62%                  | Musculoskeletal pain<br>2 (3%) vs 0 (0%)                                                                                       |
| Doorduijn et al, 2003 [26] | NHL            | N = 389<br>Filgrastim = 197<br>No filgrastim = 192 | –                                | FN incidence<br>72 pts (36.5%) vs 86 pts (44.8%)<br><br>Median (range) days<br>2 (1–14) vs 3 (1–32)<br><i>P</i> = 0.04 | NR                                                                    | Infections<br>8% vs 12%<br><i>P</i> = 0.004<br><br>Severe infections<br>3% vs 3%<br><i>P</i> = 0.82<br><br>Median antibiotic use, days (range)<br>0 (0–126) vs 6 (0–180)<br><i>P</i> = 0.006                                                                                                                                           | Days (range) hospitalization<br>5 [0–157] vs 6 [0–111]<br><i>P</i> = 0.40 | Median (range) RDI<br>95.1% (39.4–110) vs 93.4% (47.7–109)<br><i>P</i> = 0.12 | OS at 5 years<br>24% vs 22%<br><i>P</i> = 0.76 | Grade 3/4 AEs<br>Neurotoxicity<br>13 (1%) vs 33 (3%)<br>Nausea/vomiting<br>15 (1%) vs 18 (2%)<br>Diarrhea<br>8 (1%) vs 2 (<1%) |

| Author, Year          | Disease Type | Filgrastim Intervention and Patient Numbers        | Efficacy and Effectiveness       |                                                                                                  |                                                                                            |                                       |                                                                                                       |                                                     | Safety                                                                   |                                                                                                                                                                                                                                                            |
|-----------------------|--------------|----------------------------------------------------|----------------------------------|--------------------------------------------------------------------------------------------------|--------------------------------------------------------------------------------------------|---------------------------------------|-------------------------------------------------------------------------------------------------------|-----------------------------------------------------|--------------------------------------------------------------------------|------------------------------------------------------------------------------------------------------------------------------------------------------------------------------------------------------------------------------------------------------------|
|                       |              |                                                    | Time to ANC or Platelet Recovery | Incidence/Duration of FN                                                                         | Incidence/Duration of Grade 3 or Grade 4 Neutropenia                                       | Incidence of Infection/Antibiotic Use | Incidence/Duration of Hospitalizations                                                                | RDI, Dose Delays, or Dose Reductions                | Survival/Mortality                                                       | Incidence of G-CSF-Related AEs n (%) <sup>a</sup>                                                                                                                                                                                                          |
|                       |              |                                                    |                                  |                                                                                                  |                                                                                            |                                       |                                                                                                       |                                                     |                                                                          | Oral toxicity 2 (<1%) vs 4 (<1%)<br>Cardiac toxicity 9 (1%) vs 6 (1%)<br>Hemorrhage NR vs 1 (<1%)<br>Liver toxicity NR vs 1 (<1%)<br>Bone pain 3 (<1%) vs NR<br>Other 23 (2%) vs 30 (3%)                                                                   |
| Osby et al, 2003 [27] | NHL          | N = 455<br>Filgrastim = 226<br>No filgrastim = 229 | –                                | Granulocytopenic fever (<0.5x10 <sup>9</sup> /L)<br>CHOP arms 34% vs 50%<br>CNOP arms 32% vs 50% | Granulocytopenia (<0.5x10 <sup>9</sup> /L)<br>CHOP arms 55% vs 89%<br>CNOP arms 64% vs 86% | NR                                    | Granulocytopenic fever requiring hospitalization (0.5x10 <sup>9</sup> /L):<br>33% vs 50%<br>P = 0.001 | RDI ≥90% during 8 courses<br>44% vs 34%<br>P < 0.05 | OS rates<br>CHOP ± filgrastim 61% vs 51%<br>CNOP ± filgrastim 33% vs 33% | CHOP + filgrastim vs CHOP<br>Mucositis 5% vs 4%<br>GI toxicity 15% vs 10%<br>Alopecia 80% vs 81%<br>Cardiac toxicity 5% vs 3%<br>Musculoskeletal pain 10% vs 2%<br><br>CNOP + filgrastim vs CNOP<br>Mucositis 3% vs 2%<br>GI toxicity 8% vs 5%<br>Alopecia |

| Author, Year            | Disease Type | Filgrastim Intervention and Patient Numbers | Efficacy and Effectiveness                                                                                                                                                                                                        |                                                        |                                                                                                                                                                                                                                  |                                                                                                                                                                                                                                                  |                                                                                                                                                                                                 |                                      | Safety                                                                                                                                                                                        |                                                                                                                                                                         |
|-------------------------|--------------|---------------------------------------------|-----------------------------------------------------------------------------------------------------------------------------------------------------------------------------------------------------------------------------------|--------------------------------------------------------|----------------------------------------------------------------------------------------------------------------------------------------------------------------------------------------------------------------------------------|--------------------------------------------------------------------------------------------------------------------------------------------------------------------------------------------------------------------------------------------------|-------------------------------------------------------------------------------------------------------------------------------------------------------------------------------------------------|--------------------------------------|-----------------------------------------------------------------------------------------------------------------------------------------------------------------------------------------------|-------------------------------------------------------------------------------------------------------------------------------------------------------------------------|
|                         |              |                                             | Time to ANC or Platelet Recovery                                                                                                                                                                                                  | Incidence/Duration of FN                               | Incidence/Duration of Grade 3 or Grade 4 Neutropenia                                                                                                                                                                             | Incidence of Infection/Antibiotic Use                                                                                                                                                                                                            | Incidence/Duration of Hospitalizations                                                                                                                                                          | RDI, Dose Delays, or Dose Reductions | Survival/Mortality                                                                                                                                                                            | Incidence of G-CSF-Related AEs n (%) <sup>a</sup>                                                                                                                       |
|                         |              |                                             |                                                                                                                                                                                                                                   |                                                        |                                                                                                                                                                                                                                  |                                                                                                                                                                                                                                                  |                                                                                                                                                                                                 |                                      |                                                                                                                                                                                               | 47 vs 41<br>Cardiac toxicity<br>3 vs 1<br>Musculoskeletal pain                                                                                                          |
| ALL                     |              |                                             |                                                                                                                                                                                                                                   |                                                        |                                                                                                                                                                                                                                  |                                                                                                                                                                                                                                                  |                                                                                                                                                                                                 |                                      |                                                                                                                                                                                               |                                                                                                                                                                         |
| Pui et al, 1997 [29]    | ALL          | N = 148<br>Filgrastim = 73<br>Placebo = 75  | ANC recovery<br>Median days (range) for recovery to $0.5 \times 10^9$<br>5.3 vs 12.7<br><br>Platelets recovery ( $\times 10^{-3}/\text{mm}^3$ )<br>14 (2–330) vs 18 (3–120)<br><75000/ $\text{mm}^3$<br>8.9 vs 8.3                | Median (range) days with fever<br>2 (0–36) vs 2 (0–27) | NR                                                                                                                                                                                                                               | All infections<br>12 pts (16%) vs 27 (36%)<br>$P = 0.009$<br><br>Grade 3/4 infections<br>5 pts (7%) vs 6 pts (8%)<br><br>IV antibiotics use<br>42 pts vs 51 pts<br><br>Median days (range) duration of IV antibiotic use<br>6 (2–36) vs 9 (2–30) | Incidence of FN-related hospitalization<br>42 pts (58%) vs 52 pts (68%)<br>$P = 0.23$<br><br>Median days (range) duration hospital stay for FN<br>6 (1–37) vs 10 (1–30)<br>$P = 0.011$          | NR                                   | EFS at 3 years, 83% (both groups)                                                                                                                                                             | Grade 3/4 Pneumonia<br>3 vs 2<br>Bacteremia<br>1 vs 3<br>Disseminated fungal infection<br>0 vs 1<br>Typhlitis<br>1 vs 0<br>AML incidence<br>5.1% vs 3.9%<br>$P = 0.39$  |
| Larson et al, 1998 [28] | ALL          | N = 198<br>Filgrastim = 102<br>Placebo = 96 | Median days (IQR) to ANC recovery (>1000/ $\mu\text{L}$ )<br>Course I<br>16 (15–18) vs 22 (19–29)<br>$P < 0.001$<br>Course IIA<br>20 (6–25) vs 29 (22–31)<br>$P < 0.001$<br>Course IIB<br>25 (15–32) vs 31 (27–39)<br>$P < 0.001$ | NR                                                     | Median (IQ3) Neutropenia (ANC <1000/ $\mu\text{L}$ ), days:<br>Course I<br>13 (10–16) vs 20 (15–27)<br>$P < 0.001$<br>Course IIA<br>5 (0–12) vs 13 (6–18)<br>$P < 0.001$<br>Course IIB<br>11 (4–17) vs 14 (10–25)<br>$P = 0.001$ | Infections<br>78% vs 87%<br>$P = 0.13$                                                                                                                                                                                                           | Median (IQ3) hospital stay, days:<br>Course I<br>22 (18–29) vs 28 (22–33)<br>$P = 0.02$<br>Course IIA<br>7 (0–17) vs 3 (0–14)<br>$P = 0.32$<br>Course IIB<br>4 (0–21) vs 2 (0–15)<br>$P = 0.17$ | NR                                   | Estimated median overall survival after 4.7 years follow-up (years)<br>2.4 vs 1.8<br>$P = 0.25$<br><br>Died during induction, n (%):<br>All enrolled pts 5 (5) vs 11 (11)<br>All eligible pts | Grade 3/4/5 toxicity<br>Pain, 21% vs 14%, $P = 0.026$<br>All other AEs were not significantly different<br>Infection, 78% vs 87%<br>Malaise/fatigue (PS >2), 16% vs 25% |

| Author, Year                        | Disease Type  | Filgrastim Intervention and Patient Numbers                                                                      | Efficacy and Effectiveness                                                                                                                                                                                                                     |                          |                                                                                                                                                                           |                                       |                                                                                                                                  |                                                                                                                                          | Safety             |                                                                                                                                            |                                                                                                                                                                                                                                                                                                                                                         |
|-------------------------------------|---------------|------------------------------------------------------------------------------------------------------------------|------------------------------------------------------------------------------------------------------------------------------------------------------------------------------------------------------------------------------------------------|--------------------------|---------------------------------------------------------------------------------------------------------------------------------------------------------------------------|---------------------------------------|----------------------------------------------------------------------------------------------------------------------------------|------------------------------------------------------------------------------------------------------------------------------------------|--------------------|--------------------------------------------------------------------------------------------------------------------------------------------|---------------------------------------------------------------------------------------------------------------------------------------------------------------------------------------------------------------------------------------------------------------------------------------------------------------------------------------------------------|
|                                     |               |                                                                                                                  | Time to ANC or Platelet Recovery                                                                                                                                                                                                               | Incidence/Duration of FN | Incidence/Duration of Grade 3 or Grade 4 Neutropenia                                                                                                                      | Incidence of Infection/Antibiotic Use | Incidence/Duration of Hospitalizations                                                                                           | RDI, Dose Delays, or Dose Reductions                                                                                                     | Survival/Mortality | Incidence of G-CSF-Related AEs n (%) <sup>a</sup>                                                                                          |                                                                                                                                                                                                                                                                                                                                                         |
|                                     |               |                                                                                                                  | Median (IQR) days to platelet recovery (>50000/ $\mu$ L):<br>Course I<br>16 (14–20) vs 19 (15–23)<br><i>P</i> = 0.003<br>Course IIA<br>20 (17–22) vs 20 (18–22)<br><i>P</i> = 0.53<br>Course IIB<br>24 (21–31) vs 22 (0–28)<br><i>P</i> = 0.03 |                          |                                                                                                                                                                           |                                       |                                                                                                                                  |                                                                                                                                          |                    | 4 (4) vs 10 (11)<br>Died in complete remission, n (%): 8 (8) vs 5 (5)<br>Alive in continuous complete remission, n (%): 35 (41) vs 22 (31) | Hemoglobin (<6.5 g/dL), 93% vs 86%<br>Hypofibrinogenemia (<0.5 x normal), 26% vs 18%<br>Bilirubin (>1.5 x normal), 44% vs 51%<br>Nausea, 23% vs 28%<br>Motor neuropathy, 18% vs 22%<br>WBC (<1000/ $\mu$ L), 98% vs 97%<br>Platelets (<25000/ $\mu$ L), 97% vs 95%<br>Hyperglycemia (>250 mg/dL), 33% vs 35%<br>Transaminases (>5 x normal), 35% vs 35% |
| <b>Nonrandomized clinical trial</b> |               |                                                                                                                  |                                                                                                                                                                                                                                                |                          |                                                                                                                                                                           |                                       |                                                                                                                                  |                                                                                                                                          |                    |                                                                                                                                            |                                                                                                                                                                                                                                                                                                                                                         |
| Blayney et al, 2005 [30]            | NSCLC and NHL | NSCLC (n = 55):<br>Filgrastim = 46<br>No filgrastim = 9<br>NHL (n = 49):<br>Filgrastim = 44<br>No filgrastim = 5 | –                                                                                                                                                                                                                                              | NR                       | Grade 3 and grade 4 neutropenia: 62% and 77% lower with filgrastim <sup>b</sup><br><br>Median duration of grade 3 and grade 4 neutropenia: 81% and 94% lower <sup>b</sup> | NR                                    | Mean (SD) days in hospital<br>NSCLC<br>12.8 (13.1) vs 15.1 (17.5) <sup>b</sup><br><br>NHL<br>4.7 (8.4) vs 2.4 (3.3) <sup>b</sup> | NSCLC<br>Dose reduction 3% vs 12% <sup>b</sup><br>Dose delay 12% vs 38% <sup>b</sup><br><br>NHL<br>Dose reduction 12% vs 0% <sup>b</sup> | NR                 | AEs reported not specific to G-CSF                                                                                                         |                                                                                                                                                                                                                                                                                                                                                         |

| Author, Year                 | Disease Type                                                       | Filgrastim Intervention and Patient Numbers                                                                                            | Efficacy and Effectiveness       |                                                                                           |                                                      |                                                |                                                      |                                                                                                                                                                                                                                               | Safety                                                     |                                                                         |
|------------------------------|--------------------------------------------------------------------|----------------------------------------------------------------------------------------------------------------------------------------|----------------------------------|-------------------------------------------------------------------------------------------|------------------------------------------------------|------------------------------------------------|------------------------------------------------------|-----------------------------------------------------------------------------------------------------------------------------------------------------------------------------------------------------------------------------------------------|------------------------------------------------------------|-------------------------------------------------------------------------|
|                              |                                                                    |                                                                                                                                        | Time to ANC or Platelet Recovery | Incidence/Duration of FN                                                                  | Incidence/Duration of Grade 3 or Grade 4 Neutropenia | Incidence of Infection/Antibiotic Use          | Incidence/Duration of Hospitalizations               | RDI, Dose Delays, or Dose Reductions                                                                                                                                                                                                          | Survival/Mortality                                         | Incidence of G-CSF-Related AEs n (%) <sup>a</sup>                       |
|                              |                                                                    |                                                                                                                                        |                                  |                                                                                           |                                                      |                                                |                                                      | Dose delay<br>6% vs 12% <sup>b</sup>                                                                                                                                                                                                          |                                                            |                                                                         |
| <b>Observational studies</b> |                                                                    |                                                                                                                                        |                                  |                                                                                           |                                                      |                                                |                                                      |                                                                                                                                                                                                                                               |                                                            |                                                                         |
| Gilad et al, 1999 [31]       | Breast cancer, lung cancer, NHL, Hodgkin's disease, and others     | N = 209 (1079 cycles)<br>Cycles with PP filgrastim = 66<br>Cycles with no PP = 1013                                                    | –                                | FN incidence 4.5% vs 3.7%<br><i>P</i> = 0.441                                             | NR                                                   | Infections<br>1.5% vs 1.0%<br><i>P</i> = 0.781 | Hospitalized pts<br>6.0% vs 4.5%<br><i>P</i> = 0.958 | NR                                                                                                                                                                                                                                            | Deaths:<br>1 pt vs 1 pt, none from infectious complication | AEs during induction<br>1 Rash<br>3 vs 2 Musculoskeletal pain<br>2 vs 1 |
| Hershman et al, 2009 [32]    | Breast cancer, lung cancer, ovarian cancer, colon cancer, lymphoma | N = 3123<br>PP G-CSF (filgrastim or pegfilgrastim) = 822<br>No PP G-CSF (delayed filgrastim or pegfilgrastim = 1523 or no G-CSF = 778) | –                                | PP G-CSF vs no PP G-CSF<br>4.5% vs 7.5%<br>OR 0.49, 95% CI: 0.34–0.71<br><i>P</i> < 0.001 | NR                                                   | NR                                             | NR                                                   | NR                                                                                                                                                                                                                                            |                                                            | NR                                                                      |
| Altwaingi et al, 2013 [18]   | Breast cancer                                                      | N = 239<br>PP G-CSF (filgrastim or pegfilgrastim) = 145<br>No PP G-CSF (secondary G-CSF or no G-CSF) = 94                              | –                                | PP G-CSF vs no PP G-CSF<br>14% vs 31%<br><i>P</i> = 0.002                                 | NR                                                   | NR                                             | NR                                                   | RDI (range) for pts who received the FEC/D regimen<br>98% (75%–117%) vs 95% (60%–100%)<br><i>P</i> = 0.05<br>Achievement of RDI >85% for pts who received the FEC/D regimen<br>97% vs 92%<br><i>P</i> = 0.118<br><br>Dose delay<br>17% vs 27% | NR                                                         | NR                                                                      |

| Author, Year | Disease Type | Filgrastim Intervention and Patient Numbers | Efficacy and Effectiveness       |                          |                                                      |                                       |                                        |                                                                      | Safety             |                                                   |
|--------------|--------------|---------------------------------------------|----------------------------------|--------------------------|------------------------------------------------------|---------------------------------------|----------------------------------------|----------------------------------------------------------------------|--------------------|---------------------------------------------------|
|              |              |                                             | Time to ANC or Platelet Recovery | Incidence/Duration of FN | Incidence/Duration of Grade 3 or Grade 4 Neutropenia | Incidence of Infection/Antibiotic Use | Incidence/Duration of Hospitalizations | RDI, Dose Delays, or Dose Reductions                                 | Survival/Mortality | Incidence of G-CSF-Related AEs n (%) <sup>a</sup> |
|              |              |                                             |                                  |                          |                                                      |                                       |                                        | <i>P</i> = 0.060<br><br>Dose reduction 19% vs 25%<br><i>P</i> = 0.28 |                    |                                                   |

Note: filgrastim = originator filgrastim (NEUPOGEN<sup>®</sup>).

<sup>a</sup>AEs considered to be related to G-CSF include bone pain, nausea/vomiting, diarrhea, leukocytosis, thrombocytopenia, allergic reactions, splenic rupture, acute respiratory distress syndrome, dyspnea, and alveolar hemorrhage and hemoptysis. Additionally, any AEs that were compared for the filgrastim vs no filgrastim arms in any of the studies were collected as these AEs were presumed to be filgrastim-related.

<sup>b</sup>Data reported are for the subgroup of 33 pts with NSCLC and the subgroup of 15 pts with NHL who received the standard 21-day chemotherapy regimens.

Chemotherapy regimens: BEP = cisplatin, etoposide, bleomycin; BOP = bleomycin, vincristine, cisplatin; CHOP = cyclophosphamide, doxorubicin, vincristine, prednisone; CNOP = cyclophosphamide, mitoxantrone, vincristine, prednisone; EP = BEP without bleomycin; VIP-B = cisplatin, ifosfamide, etoposide, bleomycin.

AE = adverse event; ALL = acute lymphoblastic leukemia; CI = confidence interval; DFS = disease-free survival; E = adverse event; ANC = absolute neutrophil count; CIN = chemotherapy-induced neutropenia; EFS = event-free survival; FN = febrile neutropenia; G-CSF = granulocyte colony-stimulating factor; IQ3 = interquartile 3; IQR = interquartile range; IV = intravenous; NHL = non-Hodgkin's lymphoma; NR = not reported; NS = not significant; NSCLC = non-small cell lung cancer; OR = odds ratio; OS = overall survival; PP = primary prophylaxis; pts = patients; RDI = relative dose intensity; SD = standard deviation; WBC = white blood cell.



**Online Resource 7: Efficacy, effectiveness, and safety of filgrastim compared with placebo or no treatment in AML**

| Author, Year                        | Disease Type | Filgrastim Intervention and Patient Numbers              | Efficacy and Effectiveness                                                                                                              |                                                                                                                                                             |                                                                                                                                                                            |                                                                                    |                                                                                                                               |                                                                                                                                                                                                              | Safety                                                                                                                                                                                                                                |                                                                                                           |
|-------------------------------------|--------------|----------------------------------------------------------|-----------------------------------------------------------------------------------------------------------------------------------------|-------------------------------------------------------------------------------------------------------------------------------------------------------------|----------------------------------------------------------------------------------------------------------------------------------------------------------------------------|------------------------------------------------------------------------------------|-------------------------------------------------------------------------------------------------------------------------------|--------------------------------------------------------------------------------------------------------------------------------------------------------------------------------------------------------------|---------------------------------------------------------------------------------------------------------------------------------------------------------------------------------------------------------------------------------------|-----------------------------------------------------------------------------------------------------------|
|                                     |              |                                                          | Time to ANC or Platelet Recovery                                                                                                        | Incidence/Duration of FN                                                                                                                                    | Incidence/Duration of Neutropenia                                                                                                                                          | Incidence/Duration of Infections                                                   | Incidence/Duration of Antibiotic Use                                                                                          | Incidence/Duration of Hospitalization                                                                                                                                                                        | Overall Survival                                                                                                                                                                                                                      | Incidence of G-CSF-Related AEs <sup>a</sup>                                                               |
| <b>Randomized controlled trials</b> |              |                                                          |                                                                                                                                         |                                                                                                                                                             |                                                                                                                                                                            |                                                                                    |                                                                                                                               |                                                                                                                                                                                                              |                                                                                                                                                                                                                                       |                                                                                                           |
| Heil et al, 1997 <sup>b</sup> [33]  | AML          | N = 521<br>Filgrastim: n = 259<br>No filgrastim: n = 262 | Time to ANC recovery <sup>c</sup><br>Kaplan-Meier median (95% CI) days for induction 1 20 (19–20) vs 25 (24–27)<br><i>P</i> = 0.0001    | Fever incidence<br>Induction 1 91% vs 92%<br><i>P</i> = 0.50<br>Induction 2 80% vs 75%<br><i>P</i> = 0.47<br>Consolidation 1 49% vs 63%<br><i>P</i> = 0.014 | Median (range) duration of neutropenia, days<br>Induction 2: 10 (0–38) vs 14 (0–43)<br><i>P</i> = 0.015<br><br>Consolidation 1: 4 (0–46) vs 11 (0–22)<br><i>P</i> = 0.0001 | Infection rate in induction 1 37% vs 36%<br><i>P</i> = 0.85                        | Use of antibacterials:<br>Induction 1: 95% vs 96%<br><br>Use of anti-infectives<br>Induction 1: 95% vs 96%<br><i>P</i> = 0.81 | Median (range) hospital stay, days<br><br>Induction therapy: 23 (2–104) vs 29 (7–93)<br><i>P</i> = 0.0001<br><br>Induction and consolidation: 42 (15–140) vs 55 (23–114)<br><i>P</i> = 0.0001                | Median survival (95% CI), months<br><br>DFS: 10.1 (8.2–11.4) vs 9.4 (8.2–11.1)<br><i>P</i> = 0.99<br><br>OS: 12.5 (10.9–14.4) vs 14.0 (12.2–15.6)<br><i>P</i> = 0.83<br><br>Deaths in induction phase: 21 pts (8.1%) vs 25 pts (9.5%) | AEs in induction 1<br>Rash: 3% vs 2%<br><br>Musculoskeletal pain: 2% vs 1%                                |
| Godwin et al, 1998 [35]             | AML          | N = 211<br>Filgrastim: n = 106<br>Placebo: n = 105       | ANC recovery (time from chemotherapy start until neutrophil count >500/μl, days: 24 (75/104 pts recovered) vs 27 (74/103 pts recovered) | NR                                                                                                                                                          | 15% (95% CI: 3–27) shorter neutropenia duration with filgrastim<br><i>P</i> = 0.014<br><br>No difference in thrombocytopenia                                               | Number of ≥3 culture confirmed infections 21% vs 21%<br><i>P</i> = 0.82 one-tailed | Median (range) days on antibiotics 22 (0–128) vs 26 (0–69)<br><i>P</i> = 0.053 one-tailed                                     | Median (range) length of first hospitalization, days 29 (4–155) vs 29 (3–106)<br><br>Median (range) # of febrile days during the first hospitalization: 8 (0–79) vs 10 (0–34)<br><i>P</i> = 0.091 one-tailed | Median survival (95% CI) months 6 (3–8) vs 9 (7–10)<br><i>P</i> = 0.71<br><br>RFS, months 8 (4–10) vs 9 (7–10)<br><i>P</i> = 0.38                                                                                                     | Bone pain: 1 pt (1%) vs 5 pts (5%)<br><br>Fatal induction toxicities 20% (21/104 pts) vs 19% (20/103 pts) |

| Author, Year                       | Disease Type | Filgrastim Intervention and Patient Numbers              | Efficacy and Effectiveness                                                                                                                                                                                                                                      |                                                                                                                                                                       |                                                                                                                                              |                                                                                                                                                                                                                    |                                                                                                                                                             |                                                                                                                                                               | Safety                                                                                                                                                                                                                                                                                    |                                                                                                                                                                                                                 |
|------------------------------------|--------------|----------------------------------------------------------|-----------------------------------------------------------------------------------------------------------------------------------------------------------------------------------------------------------------------------------------------------------------|-----------------------------------------------------------------------------------------------------------------------------------------------------------------------|----------------------------------------------------------------------------------------------------------------------------------------------|--------------------------------------------------------------------------------------------------------------------------------------------------------------------------------------------------------------------|-------------------------------------------------------------------------------------------------------------------------------------------------------------|---------------------------------------------------------------------------------------------------------------------------------------------------------------|-------------------------------------------------------------------------------------------------------------------------------------------------------------------------------------------------------------------------------------------------------------------------------------------|-----------------------------------------------------------------------------------------------------------------------------------------------------------------------------------------------------------------|
|                                    |              |                                                          | Time to ANC or Platelet Recovery                                                                                                                                                                                                                                | Incidence/Duration of FN                                                                                                                                              | Incidence/Duration of Neutropenia                                                                                                            | Incidence/Duration of Infections                                                                                                                                                                                   | Incidence/Duration of Antibiotic Use                                                                                                                        | Incidence/Duration of Hospitalization                                                                                                                         | Overall Survival                                                                                                                                                                                                                                                                          | Incidence of G-CSF-Related AEs <sup>a</sup>                                                                                                                                                                     |
| Harousseau et al, 2000 [37]        | AML          | N = 194<br>Filgrastim: n = 100<br>No filgrastim: n = 94  | NR                                                                                                                                                                                                                                                              | Fever duration (association with neutropenia not specified), days:<br>ICC1: 5 (0–23) vs 6 (0–25)<br><i>P</i> = 0.35<br>ICC2: 5 (0–31) vs 6 (0–100)<br><i>P</i> = 0.70 | Grade 4 neutropenia duration, days<br>ICC1: 12 (5–45) vs 19 (9–39)<br><i>P</i> < 0.001<br>ICC2: 20 (7–56) vs 28 (10–100)<br><i>P</i> < 0.001 | Documented infections:<br>ICC1: 55% vs 66%<br><i>P</i> = 0.16<br>ICC2: 40.5% vs 55.5%<br><i>P</i> = 0.07<br><br>Episodes of septicemias:<br>ICC1: 40% vs 48%, <i>P</i> = 0.34<br>ICC2: 25% vs 31%, <i>P</i> = 0.05 | Median (range) duration of IV antibiotics, days:<br>ICC1: 13 (0–34) vs 15 (0–51)<br><i>P</i> = 0.02<br><br>ICC2: 15 (0–47) vs 22 (0–100)<br><i>P</i> = 0.04 | Median (range) time of hospital stay, days:<br>ICC1: 24 (17–100) vs 27 (16–61)<br><i>P</i> < 0.001<br><br>ICC2: 29 (19–62) vs 34 (21–100)<br><i>P</i> < 0.001 | Deaths: 27 pts (27%) vs 31 pts (33%)<br><br>2-year OS (SD): 64% (6%) vs 63% (6%)                                                                                                                                                                                                          | NR                                                                                                                                                                                                              |
| Usuki et al, 2002 [36]             | de novo AML  | N = 245<br>Filgrastim: n = 120<br>No filgrastim: n = 125 | Median (95% CI) time to ANC recovery to 1x10 <sup>9</sup> /L, days<br>14 (13.9–16.0) vs 22 (19.7–22.7)<br><i>P</i> < 0.0001<br><br>Median (95% CI) time to ANC recovery to 0.5x10 <sup>9</sup> /L, days<br>12 (1.7–13.5) vs 18 (17.2–20.1)<br><i>P</i> < 0.0001 | Incidence of fever 76.7% vs 76.0%<br><i>P</i> = 1.000<br><br>Median (range) duration of FN, days<br>3 (3.1–4.4) vs 4 (4.1–5.6)<br><i>P</i> < 0.0001                   | NR                                                                                                                                           | Rate of infection 83.3% vs 91.2%<br><i>P</i> = 0.083<br><br>Median (95% CI) duration of infection, days<br>11 (8.3) vs 13 (14.0)<br><i>P</i> = 0.2320                                                              | Rate of IV antibiotic use 81.7% vs 87.2%<br><i>P</i> = 0.100<br><br>IV antibiotics use, days (range)<br>16.5 (0–49) vs 17 (0–70)<br><i>P</i> = 0.7039       | NR                                                                                                                                                            | Median DFS, months<br>14.0 vs 12.5<br>DFS probability (95% CI) at 5 years:<br>34.5% (23.8–43.7%) vs 33.6% (23.3–43.9%)<br><i>P</i> = 0.9407<br><br>Median OS, months<br>20.8 vs 18.8<br>OS probability (95% CI) at 5 years<br>42.7% (31.4–52.9) vs 35.6% (25.9–45.2)<br><i>P</i> = 0.5918 | G-CSF-related: Mild musculoskeletal pain (3 pts), fever (1 pt), severe skin rash (1 pt)<br><br>G-CSF association unknown: Sweet's disease (1 pt), chest pain (1 pt), generalized pruritus, and skin rash (1 pt) |
| Heil et al, 2006 <sup>a</sup> [39] | AML          | N = 521<br>Filgrastim: n = 259<br>Placebo: n = 262       | NR                                                                                                                                                                                                                                                              | NR                                                                                                                                                                    | NR                                                                                                                                           | NR                                                                                                                                                                                                                 | NR                                                                                                                                                          | NR                                                                                                                                                            | 3-year OS (95% CI)<br>23% (18–29) vs 21% (16–26)<br>5 year OS (95% CI)                                                                                                                                                                                                                    | NR                                                                                                                                                                                                              |

| Author, Year                        | Disease Type | Filgrastim Intervention and Patient Numbers              | Efficacy and Effectiveness                                                                                                                              |                                                                   |                                   |                                                    |                                                                                                                                                               |                                                                                                                                                                    | Safety                                                                                                                |                                                                  |
|-------------------------------------|--------------|----------------------------------------------------------|---------------------------------------------------------------------------------------------------------------------------------------------------------|-------------------------------------------------------------------|-----------------------------------|----------------------------------------------------|---------------------------------------------------------------------------------------------------------------------------------------------------------------|--------------------------------------------------------------------------------------------------------------------------------------------------------------------|-----------------------------------------------------------------------------------------------------------------------|------------------------------------------------------------------|
|                                     |              |                                                          | Time to ANC or Platelet Recovery                                                                                                                        | Incidence/Duration of FN                                          | Incidence/Duration of Neutropenia | Incidence/Duration of Infections                   | Incidence/Duration of Antibiotic Use                                                                                                                          | Incidence/Duration of Hospitalization                                                                                                                              | Overall Survival                                                                                                      | Incidence of G-CSF-Related AEs <sup>a</sup>                      |
|                                     |              |                                                          |                                                                                                                                                         |                                                                   |                                   |                                                    |                                                                                                                                                               |                                                                                                                                                                    | 19 (15–24) vs 17 (12–22)                                                                                              |                                                                  |
| Beksac et al, 2011 [34]             | AML          | N = 260<br>Filgrastim: n = 123<br>No filgrastim: n = 137 | NR                                                                                                                                                      | Duration of fever, days<br>8 (1.0–27) vs 8.5 (0.0–28)<br>P = 0.96 | NR                                | NR                                                 | Antibacterial therapy<br>91.6% vs 92.4%<br>P = 0.82<br><br>Antifungal therapy<br>63.0% vs 61.8%<br>P = 0.85<br>Antiviral therapy:<br>8.4% vs 5.3%<br>P = 0.34 | Median duration (range) of hospitalization, days<br>31 (9.0–72.0) vs 35 (3.0–80.0)<br>P = 0.18                                                                     | Median OS duration (SD), days<br>239 (81) vs 184 (65)<br>P = 0.38<br><br>3-year OS (SD)<br>31.8% (5.6) vs 25.6% (5.1) | Frequent AEs in both arms: rash, musculoskeletal pain, and fever |
| <b>Nonrandomized clinical trial</b> |              |                                                          |                                                                                                                                                         |                                                                   |                                   |                                                    |                                                                                                                                                               |                                                                                                                                                                    |                                                                                                                       |                                                                  |
| Moore et al, 1997 [38]              | AML          | N = 123<br>Filgrastim: n = 61<br>No filgrastim: n = 62   | Median days to recovery (95% CI)<br>ANC ≥500/μL<br>20.5 (19–24) vs 31.1 (31–36)<br>P < 0.001<br><br>Platelets ≥20000/μL<br>23.4 (19–31) vs 30.2 (26–38) | NR                                                                | NR                                | Grade ≥3 infections:<br>58% and 47% vs 71% and 75% | NR                                                                                                                                                            | Incidence of hospitalization<br>47 pts (85%) vs 56 pts (97%)<br>P = 0.05<br><br>Duration of hospitalization<br>24 (6–44) and 20 (1–58) vs 40 (11–91) and 30 (2–80) | Median survival of pts who received third intensification course, years<br>3.4 vs 2.4<br><br>Death<br>3 pts vs 3 pts  | NR                                                               |

Note: filgrastim = originator filgrastim (NEUPOGEN®).

<sup>a</sup>AEs considered to be related to G-CSF include bone pain, nausea/vomiting, diarrhea, leukocytosis, thrombocytopenia, allergic reactions, splenic rupture, acute respiratory distress syndrome, dyspnea, and alveolar hemorrhage and hemoptysis. Additionally, any AEs that were compared for the filgrastim vs no filgrastim arms in any of the studies were collected as these AEs were presumed to be filgrastim-related.

<sup>b</sup>The two publications Heil et al 1997 and Heil et al 2006 are from the same RCT

<sup>c</sup>ANC recovery was defined as number of days from first day of chemotherapy to first 3 days with an ANC >0.5x10<sup>9</sup>/L

AEs = adverse events; AML = acute myeloid leukemia; ANC = absolute neutrophil count; CI = confidence interval; DFS = disease-free survival; FN = febrile neutropenia; G-CSF = granulocyte colony-stimulating factor; ICC = intensive consolidation chemotherapy; IV = intravenous; NR = not reported; OS = overall survival; pts = patients; RCT = randomized controlled trial; RFS = relapse-free survival.

**Online Resource 8:** Efficacy, effectiveness, and safety of filgrastim compared with placebo or no treatment in SCN

| Author, Year                       | Disease Type                                                                                | Filgrastim Intervention and Patient Numbers                                                                      | Efficacy and Effectiveness                                                                                                                                                                                                                                                                                                                                   |                                                                                                                                                                                                                                                                                                                                  |                                                                                                                                                                                                                                                                                                          | Safety              |                                                                                                                                                                                                                                                                                                                                             |
|------------------------------------|---------------------------------------------------------------------------------------------|------------------------------------------------------------------------------------------------------------------|--------------------------------------------------------------------------------------------------------------------------------------------------------------------------------------------------------------------------------------------------------------------------------------------------------------------------------------------------------------|----------------------------------------------------------------------------------------------------------------------------------------------------------------------------------------------------------------------------------------------------------------------------------------------------------------------------------|----------------------------------------------------------------------------------------------------------------------------------------------------------------------------------------------------------------------------------------------------------------------------------------------------------|---------------------|---------------------------------------------------------------------------------------------------------------------------------------------------------------------------------------------------------------------------------------------------------------------------------------------------------------------------------------------|
|                                    |                                                                                             |                                                                                                                  | Median ANC                                                                                                                                                                                                                                                                                                                                                   | Incidence of Infection/ Antibiotic Use                                                                                                                                                                                                                                                                                           | Incidence/ Duration of Hospitalization                                                                                                                                                                                                                                                                   | Survival/ Mortality | Incidence of G-CSF-Related AEs <sup>a</sup>                                                                                                                                                                                                                                                                                                 |
| <b>Randomized controlled trial</b> |                                                                                             |                                                                                                                  |                                                                                                                                                                                                                                                                                                                                                              |                                                                                                                                                                                                                                                                                                                                  |                                                                                                                                                                                                                                                                                                          |                     |                                                                                                                                                                                                                                                                                                                                             |
| Dale et al, 1993 [6]               | Severe chronic neutropenia                                                                  | N = 123<br>Filgrastim: n = 63<br>4-month observation + filgrastim: n = 60<br>Total who received filgrastim = 120 | Median ANC (1x10 <sup>9</sup> cells/L) (min-max)<br>All diagnoses filgrastim-treated vs observed for 4 months:<br>6.10 (0.03–19.44) vs 0.21 (0.00–1.55)<br><i>P</i> ≤ 0.001<br><br>>16-fold increase in ANC for filgrastim-treated vs untreated pts<br><i>P</i> ≤ 0.001<br><br>90% of 120 filgrastim-treated pts achieved ANC of 1.5x10 <sup>9</sup> cells/L | ~50% reductions in incidence and duration of infection-related events<br><i>P</i> < 0.05<br><br>~70% reduction in duration of antibiotic use                                                                                                                                                                                     | Low median incidence and median duration of hospitalizations                                                                                                                                                                                                                                             | NR                  | Exposure-adjusted AEs for pts after receiving filgrastim vs before receiving filgrastim <sup>b</sup> :<br>Headache, 35% vs 24%<br>General musculoskeletal pain, 25% vs 10%<br>Transient bone pain, 17% vs 6%<br>Rash, 10% vs 4%<br><br>Palpable splenomegaly after vs before receiving filgrastim, n/N (%):<br>29/120 (24%) vs 18/123 (14%) |
| <b>Observational study</b>         |                                                                                             |                                                                                                                  |                                                                                                                                                                                                                                                                                                                                                              |                                                                                                                                                                                                                                                                                                                                  |                                                                                                                                                                                                                                                                                                          |                     |                                                                                                                                                                                                                                                                                                                                             |
| Yilmaz et al, 2007 [40]            | Idiopathic SN, n = 31<br>Congenital SN, n = 3<br>Familial SN, n = 3<br>Autoimmune SN, n = 2 | N = 39<br>Filgrastim: n = 16<br>No filgrastim: n = 23                                                            | Median ANC at presentation (1x10 <sup>9</sup> /L) (range)<br>0.12 (0–0.35) vs 0.21 (0–0.46)<br><br>Median ANC at follow-up (1x10 <sup>9</sup> /L) (range)<br>0.16 (0–0.22) vs 0.22 (0.06–0.37)<br><br>Median duration of neutropenia that resolved, months (range)                                                                                           | At presentation / at follow-up, n (%)<br>Recurrent upper airway infections<br>8 (61.6) / 4 (30.8) vs 5 (25.7) / 3 (16.6)<br>Skin infection/ abscess<br>7 (53.9) / 4 (30.8) vs 6 (33.3) / 1 (5.5)<br>Recurrent otitis media<br>4 (30.8) / 4 (30.8) vs 7 (38.8) / 6 (33.3)<br>Pneumonia<br>3 (23.1) / 0 (0) vs 2 (11.1) / 2 (11.1) | 9 pts required hospitalization at time of diagnosis<br>3 pts were hospitalized during follow-up. None of the pts were on prophylactic antibiotics at the time of admission.<br>Indications for hospitalization:<br>pulmonary infection with respiratory distress, sepsis, fluid resuscitation, vomiting, | NR                  | NR                                                                                                                                                                                                                                                                                                                                          |

| Author, Year | Disease Type | Filgrastim Intervention and Patient Numbers | Efficacy and Effectiveness  |                                                                                                                                                                                                                                                                                                                                                                                                                                                                               |                                                                                                         | Safety              |                                             |
|--------------|--------------|---------------------------------------------|-----------------------------|-------------------------------------------------------------------------------------------------------------------------------------------------------------------------------------------------------------------------------------------------------------------------------------------------------------------------------------------------------------------------------------------------------------------------------------------------------------------------------|---------------------------------------------------------------------------------------------------------|---------------------|---------------------------------------------|
|              |              |                                             | Median ANC                  | Incidence of Infection/ Antibiotic Use                                                                                                                                                                                                                                                                                                                                                                                                                                        | Incidence/ Duration of Hospitalization                                                                  | Survival/ Mortality | Incidence of G-CSF-Related AEs <sup>a</sup> |
|              |              |                                             | 9 (5–15) vs 15 (5–36)<br>NS | Diarrhea<br>2 (15.4) / 3 (23.1) vs 1 (5.5) / 2 (11.1)<br>Stomatitis/oral ulcers<br>3 (23.1) / 3 (23.1) vs 2 (11.1) / 0 (0)<br>Brain abscess<br>1 (7.7) / 0 (0) vs 0 (0) / 0 (0)<br>Periorbital cellulitis<br>1 (7.7) / 0 (0) vs 0 (0) / 0 (0)<br>Submandibular abscess<br>1 (7.7) / 0 (0) vs 0 (0) / 0 (0)<br>Exanthema gangrenosum<br>1 (7.7) / 0 (0) vs 0 (0) / 0 (0)<br>Septic shock<br>0 (0) / 1 (7.7) vs 0 (0) / 0 (0)<br>Bacteremia<br>0 (0) / 0 (0) vs 1 (5.5) / 0 (0) | dehydration, and unstable vital functions<br>9 (29%) of pts had hospitalization history at presentation |                     |                                             |

Note: filgrastim = originator filgrastim (NEUPOGEN<sup>®</sup>).

<sup>a</sup>AEs considered to be related to G-CSF include bone pain, nausea/vomiting, diarrhea, leukocytosis, thrombocytopenia, allergic reactions, splenic rupture, acute respiratory distress syndrome, dyspnea, and alveolar hemorrhage and hemoptysis. Additionally, any AEs that were compared for the filgrastim vs no filgrastim arms in any of the studies were collected as these AEs were presumed to be filgrastim-related.

<sup>b</sup>Exposure-adjusted AEs reported are the total number of events divided by the total study exposure in pt months.

AEs = adverse events; ANC = absolute neutrophil count; G-CSF = granulocyte colony-stimulating factor; max = maximum; min = minimum; n/N = number of pts experiencing event divided by total population evaluated or that event; NR = not reported; NS = not significant; pts = patients; SCN = severe chronic neutropenia; SN = severe neutropenia.

**Online Resource 9: Efficacy, effectiveness, and safety of filgrastim compared with placebo or no treatment in BMT**

| Author, Year                        | Disease Type     | Filgrastim Intervention and Patient Numbers              | Efficacy and Effectiveness                                                                                                                                                                                                   |                                                                          |                                                                                                                                                            | Safety                                                           |                                             |
|-------------------------------------|------------------|----------------------------------------------------------|------------------------------------------------------------------------------------------------------------------------------------------------------------------------------------------------------------------------------|--------------------------------------------------------------------------|------------------------------------------------------------------------------------------------------------------------------------------------------------|------------------------------------------------------------------|---------------------------------------------|
|                                     |                  |                                                          | Time to Neutrophil/Platelet Recovery                                                                                                                                                                                         | Incidence of Infection/ Antibiotic Use                                   | Incidence/ Duration of Hospitalization                                                                                                                     | Survival/Mortality                                               | Incidence of G-CSF-Related AEs <sup>a</sup> |
| <b>Randomized controlled trials</b> |                  |                                                          |                                                                                                                                                                                                                              |                                                                          |                                                                                                                                                            |                                                                  |                                             |
| Gonzalez-Vicent et al, 2004 [41]    | ALL, solid tumor | N = 117<br>Filgrastim: n = 51<br>No filgrastim: n = 66   | Median days (range) to achieve $>0.5 \times 10^9/L$ neutrophil count<br>10 (7–14) vs 11 (8–21)<br>$P < 0.009$<br><br>Median days (range) to achieve $>50 \times 10^9/L$ platelets<br>15 (9–100) vs 14 (11–71)<br>$P < 0.005$ | Median days (range) antibiotic use<br>8 (0–50) vs 8 (0–36)<br>$P = 0.32$ | Median days (range) hospital stay<br>16 (10–72) vs 17 (6–60)<br>$P = 0.46$                                                                                 | NR                                                               | NR                                          |
| <b>Observational study</b>          |                  |                                                          |                                                                                                                                                                                                                              |                                                                          |                                                                                                                                                            |                                                                  |                                             |
| Gertz et al, 2011 [42]              | Multiple myeloma | N = 664<br>Filgrastim: n = 498<br>No filgrastim: n = 166 | Median days for neutrophil recovery<br>12.5 vs 13.5<br>$P < 0.001$<br><br>Median days to engraftment of 50000 platelets/mL<br>14.5 vs 14.5<br>$P = 0.12$                                                                     | Bacteremia:<br>39% vs 27%<br>$P = 0.005$                                 | Never hospitalized<br>38% vs 52%<br><br>Median hospital stay (days)<br>3.5 vs 0<br>$P < 0.001$<br><br>Mean hospital stay (days)<br>7 vs 4.1<br>$P < 0.001$ | All-cause mortality before day +100<br>10 pts (2%) vs 3 pts (2%) | NR                                          |

Note: filgrastim = originator filgrastim (NEUPOGEN<sup>®</sup>).

<sup>a</sup>AEs considered to be related to G-CSF include bone pain, nausea/vomiting, diarrhea, leukocytosis, thrombocytopenia, allergic reactions, splenic rupture, acute respiratory distress syndrome, dyspnea, and alveolar hemorrhage and hemoptysis. Additionally, any AEs that were compared for the filgrastim vs no filgrastim arms in any of the studies were collected as these AEs were presumed to be filgrastim-related.

AEs = adverse events; ALL = acute lymphoblastic leukemia; BMT = bone marrow transplantation; G-CSF = granulocyte colony-stimulating factor; NR = not reported; pts = patients.

## REFERENCES

1. Bodey GP, Powell RD, Jr., Hersh EM, Yeterian A, Freireich EJ. Pulmonary complications of acute leukemia. *Cancer* 1966;19:781-93.
2. Crawford J, Dale DC, Kuderer NM, Culakova E, Poniewierski MS, Wolff D, et al. Risk and timing of neutropenic events in adult cancer patients receiving chemotherapy: the results of a prospective nationwide study of oncology practice. *J Natl Compr Canc Netw* 2008;6:109-18.
3. Crawford J, Dale DC, Lyman GH. Chemotherapy-induced neutropenia: risks, consequences, and new directions for its management. *Cancer* 2004;100:228-37.
4. Crawford J, Ozer H, Stoller R, Johnson D, Lyman G, Tabbara I, et al. Reduction by granulocyte colony-stimulating factor of fever and neutropenia induced by chemotherapy in patients with small-cell lung cancer. *N Engl J Med* 1991;325:164-70.
5. Dale DC. Update on the management of neutropenia. *Clin Adv Hematol Oncol* 2006;4:187-9.
6. Dale DC, Bonilla MA, Davis MW, Nakanishi AM, Hammond WP, Kurtzberg J, et al. A randomized controlled phase III trial of recombinant human granulocyte colony-stimulating factor (filgrastim) for treatment of severe chronic neutropenia. *Blood* 1993;81:2496-502.
7. Chang J. Chemotherapy dose reduction and delay in clinical practice. evaluating the risk to patient outcome in adjuvant chemotherapy for breast cancer. *Eur J Cancer* 2000;36(Suppl 1):S11-4.
8. Lyman GH, Dale DC, Crawford J. Incidence and predictors of low dose-intensity in adjuvant breast cancer chemotherapy: a nationwide study of community practices. *J Clin Oncol* 2003;21:4524-31.

9. Chatta GS, Price TH, Allen RC, Dale DC. Effects of in vivo recombinant methionyl human granulocyte colony-stimulating factor on the neutrophil response and peripheral blood colony-forming cells in healthy young and elderly adult volunteers. *Blood* 1994;84:2923-9.
10. Price TH, Chatta GS, Dale DC. Effect of recombinant granulocyte colony-stimulating factor on neutrophil kinetics in normal young and elderly humans. *Blood* 1996;88:335-40.
11. NEUPOGEN® (filgrastim) [prescribing information]: Thousand Oaks, CA: Amgen Inc.
12. Liberati A, Altman DG, Tetzlaff J, Mulrow C, Gotzsche PC, Ioannidis JP, et al. The PRISMA statement for reporting systematic reviews and meta-analyses of studies that evaluate healthcare interventions: explanation and elaboration. *BMJ* 2009;339:b2700.
13. Cooper KL, Madan J, Whyte S, Stevenson MD, Akehurst RL. Granulocyte colony-stimulating factors for febrile neutropenia prophylaxis following chemotherapy: systematic review and meta-analysis. *BMC Cancer* 2011;11:404.
14. Renner P, Milazzo S, Liu JP, Zwahlen M, Birkmann J, Horneber M. Primary prophylactic colony-stimulating factors for the prevention of chemotherapy-induced febrile neutropenia in breast cancer patients. *Cochrane Database Syst Rev* 2012;10:CD007913.
15. Sheppard D, Bredeson C, Allan D, Tay J. Systematic review of randomized controlled trials of hematopoietic stem cell mobilization strategies for autologous transplantation for hematologic malignancies. *Biol Blood Marrow Transplant* 2012;18:1191-203.
16. DerSimonian R, Laird N. Meta-analysis in clinical trials. *Control Clin Trials* 1986;7:177-88.
17. DerSimonian R, Laird N. Meta-analysis in clinical trials revisited. *Contemp Clin Trials* 2015;45:139-45.
18. Altwaairgi AK, Hopman WM, Mates M. Real-world impact of granulocyte-colony stimulating factor on febrile neutropenia. *Curr Oncol* 2013;20:e171-9.
19. He M., Huang S, Yu L, et al. Evaluation of the quality of life and economic burden with granulocyte-colony stimulating factor in Chinese breast cancer patients receiving docetaxel, epirubicin and cyclophosphamide. *Ann Oncol* (2012) 23 (suppl 9): ix499-ix527.



doi: 10.1093/annonc/mds416 This article appears in: Abstract Book of the 37th ESMO Congress Vienna, Austria, 28 September – 2 October 2012.

20. Papaldo P, Lopez M, Cortesi E, Cammilluzzi E, Antimi M, Terzoli E, et al. Addition of either lonidamine or granulocyte colony-stimulating factor does not improve survival in early breast cancer patients treated with high-dose epirubicin and cyclophosphamide. *J Clin Oncol* 2003;21:3462-8.
21. del Giglio A, Eniu A, Ganea-Motan D, Topuzov E, Lubenau H. XM02 is superior to placebo and equivalent to Neupogen in reducing the duration of severe neutropenia and the incidence of febrile neutropenia in cycle 1 in breast cancer patients receiving docetaxel/doxorubicin chemotherapy. *BMC Cancer* 2008;8:332.
22. Welte K, Platzer E, Lu L, Gabrilove JL, Levi E, Mertelsmann R, et al. Purification and biochemical characterization of human pluripotent hematopoietic colony-stimulating factor. *Proc Natl Acad Sci U S A* 1985;82:1526-30.
23. Trillet-Lenoir V, Green J, Manegold C, Von Pawel J, Gatzemeier U, Lebeau B, et al. Recombinant granulocyte colony stimulating factor reduces the infectious complications of cytotoxic chemotherapy. *Eur J Cancer* 1993;29A:319-24.
24. Fossa SD, Kaye SB, Mead GM, Cullen M, de Wit R, Bodrogi I, et al. Filgrastim during combination chemotherapy of patients with poor-prognosis metastatic germ cell malignancy. European Organization for Research and Treatment of Cancer, Genito-Urinary Group, and the Medical Research Council Testicular Cancer Working Party, Cambridge, United Kingdom. *J Clin Oncol* 1998;16:716-24.
25. Zinzani PL, Pavone E, Storti S, Moretti L, Fattori PP, Guardigni L, et al. Randomized trial with or without granulocyte colony-stimulating factor as adjunct to induction VNCOP-B treatment of elderly high-grade non-Hodgkin's lymphoma. *Blood* 1997;89:3974-9.

26. Doorduijn JK, van der Holt B, van Imhoff GW, van der Hem KG, Kramer MH, van Oers MH, et al. CHOP compared with CHOP plus granulocyte colony-stimulating factor in elderly patients with aggressive non-Hodgkin's lymphoma. *J Clin Oncol* 2003;21:3041-50.
27. Osby E, Hagberg H, Kvaloy S, Teerenhovi L, Anderson H, Cavallin-Stahl E, et al. CHOP is superior to CNOP in elderly patients with aggressive lymphoma while outcome is unaffected by filgrastim treatment: results of a Nordic Lymphoma Group randomized trial. *Blood* 2003;101:3840-8.
28. Larson RA, Dodge RK, Linker CA, Stone RM, Powell BL, Lee EJ, et al. A randomized controlled trial of filgrastim during remission induction and consolidation chemotherapy for adults with acute lymphoblastic leukemia: CALGB study 9111. *Blood* 1998;92:1556-64.
29. Pui CH, Boyett JM, Hughes WT, Rivera GK, Hancock ML, Sandlund JT, et al. Human granulocyte colony-stimulating factor after induction chemotherapy in children with acute lymphoblastic leukemia. *N Engl J Med* 1997;336:1781-7.
30. Blayney DW, McGuire BW, Cruickshank SE, Johnson DH. Increasing chemotherapy dose density and intensity: phase I trials in non-small cell lung cancer and non-Hodgkin's lymphoma. *Oncologist* 2005;10:138-49.
31. Gilad J, Riesenberk K, Mermershtain W, Borer A, Porath A, Schlaeffer F. Granulocyte-colony stimulating factor for the prevention of chemotherapy-induced febrile neutropenia in the adult cancer patient population of Southern Israel. *Support Care Cancer* 1999;7:260-4.
32. Hershman D, Hurley D, Wong M, Morrison VA, Malin JL. Impact of primary prophylaxis on febrile neutropenia within community practices in the US. *J Med Econ* 2009;12:203-10.
33. Heil G, Hoelzer D, Sanz MA, Lechner K, Liu Yin JA, Papa G, et al. A randomized, double-blind, placebo-controlled, phase III study of filgrastim in remission induction and consolidation therapy for adults with de novo acute myeloid leukemia. The International Acute Myeloid Leukemia Study Group. *Blood* 1997;90:4710-8.

34. Beksac M, Ali R, Ozcelik T, Ozcan M, Ozcebe O, Bayik M, et al. Short and long term effects of granulocyte colony-stimulating factor during induction therapy in acute myeloid leukemia patients younger than 65: results of a randomized multicenter phase III trial. *Leuk Res* 2011;35:340-5.
35. Godwin JE, Kopecky KJ, Head DR, Willman CL, Leith CP, Hynes HE, et al. A double-blind placebo-controlled trial of granulocyte colony-stimulating factor in elderly patients with previously untreated acute myeloid leukemia: a Southwest oncology group study (9031). *Blood* 1998;91:3607-15.
36. Usuki K, Urabe A, Masaoka T, Ohno R, Mizoguchi H, Hamajima N, et al. Efficacy of granulocyte colony-stimulating factor in the treatment of acute myelogenous leukaemia: a multicentre randomized study. *Br J Haematol* 2002;116:103-12.
37. Harousseau JL, Witz B, Lioure B, Hunault-Berger M, Desablens B, Delain M, et al. Granulocyte colony-stimulating factor after intensive consolidation chemotherapy in acute myeloid leukemia: results of a randomized trial of the Groupe Ouest-Est Leucemies Aigues Myeloblastiques. *J Clin Oncol* 2000;18:780-7.
38. Moore JO, Dodge RK, Amrein PC, Kolitz J, Lee EJ, Powell B, et al. Granulocyte-colony stimulating factor (filgrastim) accelerates granulocyte recovery after intensive postremission chemotherapy for acute myeloid leukemia with aziridinyI benzoquinone and mitoxantrone: Cancer and Leukemia Group B study 9022. *Blood* 1997;89:780-8.
39. Heil G, Hoelzer D, Sanz MA, Lechner K, Noens L, Szer J, et al. Long-term survival data from a phase 3 study of Filgrastim as an adjunct to chemotherapy in adults with de novo acute myeloid leukemia. *Leukemia* 2006;20:404-9.
40. Yilmaz D, Ritchey AK. Severe neutropenia in children: a single institutional experience. *J Pediatr Hematol Oncol* 2007;29:513-8.
41. Gonzalez-Vicent M, Madero L, Sevilla J, Ramirez M, Diaz MA. A prospective randomized study of clinical and economic consequences of using G-CSF following autologous

- peripheral blood progenitor cell (PBPC) transplantation in children. *Bone Marrow Transplant* 2004;34:1077-81.
42. Gertz MA, Gastineau DA, Lacy MQ, Dispenzieri A, Hayman SR, Kumar SK, et al. SCT without growth factor in multiple myeloma: engraftment kinetics, bacteremia and hospitalization. *Bone Marrow Transplant* 2011;46:956-61.
  43. Schmitz N, Dreger P, Zander AR, Ehninger G, Wandt H, Fauser AA, et al. Results of a randomised, controlled, multicentre study of recombinant human granulocyte colony-stimulating factor (filgrastim) in patients with Hodgkin's disease and non-Hodgkin's lymphoma undergoing autologous bone marrow transplantation. *Bone Marrow Transplant* 1995;15:261-6.
  44. Stahel RA, Jost LM, Cerny T, Pichert G, Honegger H, Tobler A, et al. Randomized study of recombinant human granulocyte colony-stimulating factor after high-dose chemotherapy and autologous bone marrow transplantation for high-risk lymphoid malignancies. *J Clin Oncol* 1994;12:1931-8.
  45. Lyman GH, Reiner M, Morrow PK, Crawford J. The effect of filgrastim or pegfilgrastim on survival outcomes of patients with cancer receiving myelosuppressive chemotherapy. *Ann Oncol* 2015;26:1452-8.
  46. Wildiers H, Reiser M. Relative dose intensity of chemotherapy and its impact on outcomes in patients with early breast cancer or aggressive lymphoma. *Crit Rev Oncol Hematol* 2011;77:221-40.
  47. Balducci L, Mo M, Abella E, Saven A. Retrospective analysis of relative dose intensity in patients with non-Hodgkin lymphoma receiving CHOP-based chemotherapy and pegfilgrastim. *Am J Clin Oncol* 2014;37:603-10.
  48. Denduluri N, Patt DA, Wang Y, Bhor M, Li X, Favret AM, et al. Dose Delays, Dose Reductions, and Relative Dose Intensity in Patients With Cancer Who Received Adjuvant

- or Neoadjuvant Chemotherapy in Community Oncology Practices. *J Natl Compr Canc Netw* 2015;13:1383-93.
49. Havrilesky LJ, Reiner M, Morrow PK, Watson H, Crawford J. A review of relative dose intensity and survival in patients with metastatic solid tumors. *Crit Rev Oncol Hematol* 2015;93:203-10.
  50. Dale DC, Cottle TE, Fier CJ, Bolyard AA, Bonilla MA, Boxer LA, et al. Severe chronic neutropenia: treatment and follow-up of patients in the Severe Chronic Neutropenia International Registry. *Am J Hematol* 2003;72:82-93.
  51. Hwang WYK, Poon Z, Bari S. Improving the efficacy and availability of stem cell transplant therapies for hematopoietic stem cell transplantation. *J Stem Cell Res Ther* 2014;4:214. Available at: <http://dx.doi.org/10.4172/2157-7633.1000214>.
  52. Maher DW, Lieschke GJ, Green M, Bishop J, Stuart-Harris R, Wolf M, et al. Filgrastim in patients with chemotherapy-induced febrile neutropenia. A double-blind, placebo-controlled trial. *Ann Intern Med* 1994;121:492-501.
  53. Pabst T, Vellenga E, van Putten W, Schouten HC, Graux C, Vekemans MC, et al. Favorable effect of priming with granulocyte colony-stimulating factor in remission induction of acute myeloid leukemia restricted to dose escalation of cytarabine. *Blood* 2012;119:5367-73.
  54. Boxer LA, Hutchinson R, Emerson S. Recombinant human granulocyte-colony-stimulating factor in the treatment of patients with neutropenia. *Clin Immunol Immunopathol* 1992;62:S39-46.
  55. Linker C, Anderlini P, Herzig R, Christiansen N, Somlo G, Bensinger W, et al. Recombinant human thrombopoietin augments mobilization of peripheral blood progenitor cells for autologous transplantation. *Biol Blood Marrow Transplant* 2003;9:405-13.
